# Supplementary material for: Oxygen minimum zone of the open Arabian Sea: variability of oxygen and nitrite from daily to decadal timescales
Source: Copernicus journal article supplement (doi:10.5194/bg-11-2237-2014), 2014-04-23

## Supplementary Material

### S.1 The southern boxes

Offshore in the southern Arabian Sea (Boxes A-C, 10°-12°N) below the mixed layer, advection of the Subantarctic Mode Water (SAMW) from the south tends to split the low-oxygen water vertically into two parts, with the associated O<sub>2</sub> maximum occurring at roughly 250 m depth (Wyrki, 1971: table 441; Sen Gupta et al., 1976; see also Fig. 2C in Beal et al., 2003). When discussing their section published in 1976, Sen Gupta and Naqvi (1984) adopted Warren's (1981) nomenclature (SAMW) for this water, which is also characterized by a salinity minimum. The density ( $\sigma_t$ ) of the water mass (26.5-26.8 kg m<sup>-3</sup>) is similar to that of the high-salinity Persian Gulf Water (PGW) found in our northern boxes, but the salinities and O<sub>2</sub> contents of the two water masses are clearly different. Along the longitudes studied here, the weak O<sub>2</sub> maximum of the SAMW extends poleward up to 10°-12°N depending on the depth (Naqvi et al., 1993) and, as we add here, probably also depending on the strength of the poleward advection. Recall the greatly variable hydrography on four recent zonal sections near 8°N through Box A1, including the aeration, especially down to about 250 m depth (Chereskin et al., 2002; Stramma et al., 2002; Beal et al., 2003; see also Sect. 3.1).

### S.2 Bias in the O<sub>2</sub> data

Most of our data since the mid-1970s were collected by India's National Institute of Oceanography employing 60-ml bottles, adding 0.5 ml each of the two Winkler reagents, and analyzing with the visual starch-based endpoint detection procedure. The small amount of O<sub>2</sub> carried by the reagents was not subtracted and sodium azide (NaN<sub>3</sub>) was not added to take care of NO<sub>2</sub><sup>-</sup> interference in the Winkler titration. The lower limit of detection is approximately 0.05 mL L<sup>-1</sup> (~ 2 μM). The correction for blanks, if any, for the other (non-Indian) data based on visual endpoints and used by us is unknown.

Many of our samples from the OMZ carry micromolar concentrations of NO<sub>2</sub><sup>-</sup>, which oxidizes the iodide of the reagent to I<sub>2</sub> and raises the apparent O<sub>2</sub> content. Moreover, the resulting nitric oxide will during the titration in the Winkler procedure combine with newly dissolving O<sub>2</sub> and form new NO<sub>2</sub><sup>-</sup>, which will react with iodide to form new I<sub>2</sub>. This interference in the iodometric O<sub>2</sub> determination has been addressed in freshwater research for many decades by routinely adding sodium azide (NaN<sub>3</sub>) to the Winkler reagent for eliminating NO<sub>2</sub><sup>-</sup> (e.g., Maucha, 1932). For sea water, Wong (2012) urged consideration of the interference. Azide was added on the R/V *T. G. Thompson* cruises (Morrison et al., 1999) but not, to our knowledge, on the cruises studied by us. Therefore we corrected our O<sub>2</sub> overestimation where the concurrent NO<sub>2</sub><sup>-</sup> measurements were above 0.2-0.3 μM (italicized in Supplement in the text, Table S.1.b) by multiplying the O<sub>2</sub> values by 0.4 (from Wong, 2012). (Independently from Wong, we had determined the same correction factor of 0.4 although with a wider confidence interval.)

To assess the more important overestimate of O<sub>2</sub> by titration with the Visual Endpoint Detection (VED) as in all of our data, we compared our values in three reoccupied boxes of 1994/1995 (D1, D2, and F1) with data by R/V *T. G. Thompson* during the same period, which are based on Winkler analyses with the Automated (photometric) Endpoint Detection (AED) following the JGOFS Manual (Anon., 1994). While the O<sub>2</sub> carried by the reagents is accounted for by the Manual, to our knowledge it was not considered on the cruises in our data listing (Supplement in the text, Table S.1.b).

The resulting statistics are given in Supplement in the text, Table S.2.1. All 14 differences of the medians of VED are positive, seven of them significantly so. The median of all 14 medians is 0.035 mL L<sup>-1</sup> (range, 0.010-0.085), that of the seven significant differences is 0.055 mL L<sup>-1</sup> (range, 0.045-0.085; these values replace those in Banse and Postel, 2009: 92). Further, we estimate for the bulk of our O<sub>2</sub> data, measured by India's National Institute of Oceanography, that ~ 0.016 mL L<sup>-1</sup> O<sub>2</sub> was added by the reagents (see solubilities in Murray et al. [1968] and the volumes of reagents and sample bottles, without considering temperature effects). Subtracting the O<sub>2</sub> carried by the VED reagents from the tabled value, we suggest that the median overestimate by the VED over the AED of JGOFS in the three sampled boxes is ~ 0.04 mL L<sup>-1</sup> (~ 2 μM). We generalize the bias found for 1994-1995 as valid for all O<sub>2</sub> measurements in Supplement in the text, Table S.1.b.

### S.3 Temporal and spatial variability in the OMZ

A clear example of temporal variability at a fixed station is the gradual appearance in the late 1995 SWM of the Persian Gulf Water (PGW) once out of the six visits by R/V *T. G. Thompson* to JGOFS sta. S15 (10°N, 65°E) in 1994/1995. While the ship during a 48-h stay kept her position within 9 km, the intrusion expanded from initial absence to occupying the depth interval from 300 to 370 m. The peak salinity changed from 35.30 to 35.45.

As another example, Supplement in the text, Fig. S.3.1 depicts sections to 500 m depth of isopleths for salinity and  $\text{NO}_2^-$  on the scale of about half a degree of latitude and 11 days in the northern OMZ, when temporal and spatial effects cannot be easily separated.

### S.4 Meso-zooplankton records from the OMZ

To document further that metazoan zooplankton reside in the OMZ of the Arabian Sea, the following records are cited.

Based on divided hauls with a net of 0.33 mm mesh size in the northern Arabian Sea in 1960, Vinogradov and Voronina (1962) and Vinogradov (1970: 272 and Table 71) recorded a median plankton wet weight (presumably preserved, Vinogradov, 1970: Ch. 2, Processing) of  $\sim 5 \text{ mg m}^{-3}$  in the 200- to 500-m depth interval with its OMZ biomass minimum. Between 150 and 500 m depth at  $< 0.1 \text{ mL L}^{-1} \text{ O}_2$ , the two authors reported numerous euphausiids, and single copepods of five other species.

Böttger-Schnack (1996) sampled with divided nocturnal hauls of about  $12 \text{ m}^3$  in 50-m steps with  $55 \mu\text{m}$  mesh size at a station in our Box E2 in SI 1987. As estimated from her Figs. 2 and 3, she recorded  $1 \text{ mg m}^{-3}$  of plankton wet weight and 10-20  $\text{m}^{-3}$  of adults and identifiable juveniles of copepods from the plankton minimum in the top of the  $\text{O}_2$  minimum. The biomass rose by about tenfold in the next 200 to 300 (400) m depth with slightly enhanced  $\text{O}_2$  content, but the increase was not accompanied by higher specimen numbers. She noted that the SI season is the most oligotrophic part of the year, implying that the abundance may be higher in the other seasons. As found also by others from other open-sea OMZs, many species were present both in the epi- and bathypelagials but dropped out at low  $\text{O}_2$  values. Those present often seemed to be layered, which is observable only in narrow depth intervals as studied by Böttger-Schnack (1996; see also Saltzman et al., 1997, and Wishner et al., 2008). Also remarkable for the first-named paper but usually not reported was the large fraction of carcasses and discarded exoskeletons, often one half of the total, in much of the OMZ.

Wishner et al. (1998) reported on divided hauls in 50- or 25-m steps at 5-6 stations in the upper OMZ during four seasons of 1995. Wet weights (preserved) at four offshore stations showed a distinct minimum on the order of  $1 \text{ mg m}^{-3}$  between about 200 and 400 m depth without clear seasonality. A secondary biomass maximum with about a tenfold increase occurred down to about 750 m. Specimen numbers per  $1000 \text{ m}^3$  of individual species of calanoid copepods (adults and identifiable copepodites, i.c.: Fig. 9) were several tens up to 100 in the 300- to 450-m depth interval and several tens to several hundreds up to 1000 in the slightly better oxygenated 500- to 750-m interval ( $\text{O}_2 \sim 0.05\text{-}0.015 \text{ mL L}^{-1}$ ,  $\sim 2.3\text{-}6.5 \mu\text{M}$ ). Their work stresses the response of species to small vertical  $\text{O}_2$  changes, which leads to marked vertical zonation. The largest number of species in the lower OMZ was observed at  $\text{O}_2 > 0.14 \text{ mL L}^{-1}$ . (These  $\text{O}_2$  values were obtained with automated Winkler titration and with azide added to suppress  $\text{NO}_2^-$  interference; they are about  $0.04 \text{ mL L}^{-1}$  lower than those used in the bulk of our paper.)

From Madhupratap et al. (2001), who used a closing net with  $200 \mu\text{m}$  mesh size during the FIs of 1992 and 1993 along  $64^\circ\text{E}$ , we convert (cf. their p. 1347) the nighttime carbon values in Table 2 and obtain 1.5, 0.4, 0.7, and  $0.3 \text{ mg m}^{-3}$  dry weight from about  $25 \text{ m}^3$  of water strained in the 300-200 m depth interval at  $15^\circ$ ,  $17^\circ$ ,  $19^\circ$ , and  $21^\circ\text{N}$ , respectively.

Fabian et al. (2005) employed divided nocturnal net hauls of  $3000$  to  $4000 \text{ m}^3$  in  $\geq 50\text{-m}$  steps with  $333 \mu\text{m}$  mesh size near the CAST sediment trap site at a station in our Box D1 during FI 1995, SI 1997, and NEM 1998. As estimated from their Figs. 2, 3, 5, and 7, they collected about 300, 5000, and 700 copepods per  $1000 \text{ m}^3$  in the plankton minimum near the top of the  $\text{O}_2$  minimum. Specimen numbers increased by ten- to almost one-hundred-fold in the secondary maximum of the next few hundred meters of depth. In the same hauls from the plankton minimum, pelagic ostracods numbered about 60, 100, and 20, respectively, while chaetognaths vanished. The differences of abundance between seasons *cum* years are marked and the high counts of the SI 1997 contrast with those of Böttger-Schnack (1996) for the same season of 1987.

Of larger forms resident in the OMZ of the Arabian Sea, about 100 specimens of a shrimp, one of a euphausiid species, and two mesopelagic fish per 1000 m<sup>-3</sup> (Wishner et al., 2008) and about one fish-eating mesopelagic fish per 10,000 m<sup>-3</sup> (Butler et al., 2001) were collected nocturnally during one and two cruises, respectively. Four shrimp species appear to reside almost entirely in the OMZ, their nighttime abundances per 1000 m<sup>3</sup> in the upper OMZ near 15°20'N, 61°30'E being 7-9, 2, 0.2-0.3, and 0.1 or 0.4 specimens, respectively (Mincks et al., 2000). All these species likely prey on copepods and smaller fish.

Ignatyev (2006) collected macroplankton to 100 m depth by midwater trawls with 0.5 mm mesh size in the cod end in the western and northwestern Arabian Sea on principally three cruises during 1980, 1981, and 1990. The biomass and taxonomic composition varied between day and night, seasons, and due to presence or absence of eddies. For example, at night in zones of anticyclonic eddies, crustaceans and coelenterates contributed 40-81% (mean, 47%) and 27-60 (mean, 37%) of macroplankton wet weight, respectively. In contrast, in upwelling water of cyclonic eddies, 67 [sic]-92% (mean, 59%) of biomass were contributed by tunicates alone. Important to note is that 20-42% of the gross weight of all catches were remains of unidentifiable gelatinous animals, usually not reported in publications.

## S.5 Salinity on year

Supplement in the text, Table S.4 lists slopes of regressions on year for four decades in all boxes, while Table S.5 comprises seasonal regressions for the OMZ when  $\geq 15$  contiguous years were at hand.

## S.6 Four-decadal changes of O<sub>2</sub>

Looking in Supplement in the text, Table S.6 at the negative regression slopes in Boxes D1-F1 between 200 and 500 m (D-boxes also with 150 m; Box E, lat. 18°N, is hardly represented), depths largely cannot be distinguished from each other. Exceptions are a few with 2-3 values each that differ on the  $p = 0.2$  level. These low levels of significance, if any, among depths will be neglected in the following.

For the NEM, the median slope of all indicated depths combined is  $-0.0041 \text{ mL L}^{-1} \text{ a}^{-1}$  ( $n = 11$ ; six significant slopes, median,  $-0.0045 \text{ mL L}^{-1}$ ; 0.18 and 0.20  $\mu\text{M}$ ). The median differs at  $p < 0.01$  from that for the SWM of  $-0.0019 \text{ mL L}^{-1} \text{ a}^{-1}$  ( $n = 12$ ; seven significant slopes, median,  $-0.0022 \text{ mL L}^{-1}$  (-0.09 and -0.10  $\mu\text{M}$ , respectively). An even larger difference between NEM and SWM is found in Box F1 (medians,  $-0.0064$  vs.  $-0.0014 \text{ mL L}^{-1} \text{ a}^{-1}$ ;  $p = 0.05$ ,  $n = 4$  and 3, respectively), but there is no statistical difference for Box D2. In contrast to these central boxes, the median for the nine NEM slopes in the northern boxes F2, G1, and G2 is  $+0.0038 \text{ mL L}^{-1} \text{ a}^{-1}$  (without 150 m; only one negative slope, four significant slopes, median, 0.0045, Table 7). Within each latitudinal band the only west-east difference of slopes are  $D1 > D2$  ( $p = 0.2$ ,  $n = 5$  and 5) during the SWM and  $F2 > F1$  ( $p = 0.01$ ;  $n = 4$  and 4) during the NEM.

A detailed statistical study of Tables 7 and Supplement in the text, S7 is inadvisable because 52 values  $> 0.10 \text{ mL L}^{-1}$  (38 for the 200- to 500-m horizons) were not accompanied by  $\text{NO}_2^-$  measurements and had to be accepted at face value (see Sect. 2.3). The majority occurred in the southern boxes, but overall, inspection showed that these unsupported data were not found more often above than below the regression lines. For the 18 cases with  $> 2$  of such values, regressions of O<sub>2</sub> on year were run again. The sign of the slopes changed for three lines, but in all cases the values were altered only in the third or fourth decimal places, so the inclusion of the unsupported determinations is justifiable.

## S.7 Decadal change of nitrite

To study decadal change of  $\text{NO}_2^-$  in another way, the number of “zero values” (i.e.,  $\leq 0.2 \mu\text{M}$ ), of  $\geq 0.5 \mu\text{M}$ , and of  $\geq 1.5 \mu\text{M}$ , each relative to the total number of  $\text{NO}_2^-$  values for a depth and box for 1985 and earlier, are compared with the data acquired since then. Unweighted percentages of the totals are used and only cases with total  $n > 2$  are considered. Also, in view of the medians in Table 2, to avoid possible decadal bias the 150-m horizon is omitted except in Box D2, while the 400- and 500-m depths are excluded for the D-boxes, as well as 500 m for the E-boxes. For the “zero values” there is no difference between the medians of the percentages in the western (D1-G1) boxes for  $\leq 1985$  and  $\geq 1986$  (medians, 31.5 and 33%;  $n = 12$  and 16, respectively). In contrast, the medians in the D2-G2

boxes differ at  $p = 0.01$  (medians 14 and 2.5%;  $n = 2$  and 12, respectively). Thus there is an increase of denitrification in the eastern boxes in the second period. The only significant difference among seasonal medians ( $p = 0.2$ ) occurs with the same sign during the NEM in the eastern boxes ( $\leq 1985$  vs.  $\geq 1986$ , medians, 32 and 11.5% respectively; both  $n = 4$ ).

Considering the percentages of values  $\geq 0.5 \mu\text{M}$  for the two periods with the same criteria as above, the first and second periods when ranked within seasons (lumped for all boxes) did not differ. Comparing the percentages of the early and later periods within the western and eastern boxes, the medians did not differ in the west (both were 56%;  $n = 12$  and 16, respectively), while in the east they differed at  $p = 0.01$  (medians, 75 and 83%;  $n = 11$  and 13, respectively). For values  $\geq 1.5 \mu\text{M}$  within the western and eastern boxes, the percentages for the second period ranked significantly larger in both the western and eastern boxes at  $p = 0.05$  and  $p < 0.01$ , respectively (medians, 21 and 37%;  $n = 12$  and 16 in the west; and medians of 43 and 70%;  $n = 11$  and 13 in the east). In contrast to the  $\geq 0.5 \mu\text{M}$  comparison, the percentages within seasons (lumped for all boxes) for the  $\geq 1.5 \mu\text{M}$  values were higher in the  $\geq 1986$ - than the  $\leq 1985$ -periods for the NEM ( $p = 0.01$ , medians, 66 and 33%;  $n = 8$  and 8), the SWM ( $p = 0.1$ , medians 43 and 0%;  $n = 5$  and 8), and the FI ( $p = 0.2$ , medians 59 and 22%;  $n = 6$  and 4); the trend for the SI (medians 47 and 42%;  $n = 6$  and 6) was in the same direction. Thus denitrification increased after 1985 also by these measures. In view of the difference in  $\text{O}_2$  between the NEM and the SWM (Sect. 4.2.1), the numbers of  $\geq 1.5 \mu\text{M}$  values among the two seasons lumped for all boxes were compared for the period  $\geq 1986$  but did not differ (NEM and SWM, medians, 66 and 43%,  $n = 8$  and 8).

Table S.1.a. Abbreviations of ship names in Table S.1.b.

| Country | Code  | Ship Name                                     |
|---------|-------|-----------------------------------------------|
| Germany | ME    | <i>Meteor</i>                                 |
|         | SONNE | <i>Sonne</i>                                  |
| India   | GV    | <i>Gaveshani</i>                              |
|         | KI    | <i>Kistna</i>                                 |
|         | SK    | <i>Sagar Kanya</i>                            |
|         | AAS   | <i>A.A. Siderenko</i>                         |
|         | SS    | <i>Sagar Sampada</i>                          |
| Japan   | UM    | <i>Umitaka Maru</i>                           |
| UK      | DI    | <i>Discovery</i>                              |
| Ukraine | PV    | <i>Prof. Vodyanitsky</i>                      |
| US      | AB    | <i>Anton Bruun</i>                            |
|         | AT    | <i>Atlantis</i>                               |
|         | RQ    | <i>Requisite</i>                              |
|         | TN    | <i>T.G. Thompson</i>                          |
| USSR    | ML    | <i>Mikhail Lomonosov</i>                      |
|         | OK    | <i>Okean</i>                                  |
|         | PI    | <i>Priliv</i>                                 |
|         | SC    | <i>Akademik Shirshov</i>                      |
|         | SH    | <i>Shokalsky</i>                              |
|         | VE    | <i>Akademik Vernadsky</i>                     |
|         | VI    | <i>Vityaz</i>                                 |
| WOCE    |       | <i>World Ocean Circulation<br/>Experiment</i> |

Table S.1.b. The data are arranged vertically within boxes (with center latitudes and longitudes) by ship (see Table S.1.a for ship names), station designation, date, decimal year, and season (a, northeast monsoon; b, spring intermonsoon; c, southwest monsoon; d, fall intermonsoon), depth (m), oxygen ( $\text{mL L}^{-1}$ ; italicized values corrected for  $\text{NO}_2^-$  interference, see Supplement in the text, Sect. S.2.3), nitrite ( $\mu\text{M}$ ), temperature ( $^\circ\text{C}$ ), and salinity (psu). Medians and number of samples are listed below boxes. The body of this table (the data list) may be found beginning on the following page.

Table S1b

| Ship                  | Sta     | Date   | dYear  | Season | 150mO       | 200mO       | 300mO       | 400mO       | 500mO       | 150mN       | 200mN       | 300mN       | 400mN       | 500mN       | 150mT        | 200mT        | 300mT        | 400mT        | 500mT        | 150mS        | 200mS        | 300mS        | 400mS        | 500mS        |       |
|-----------------------|---------|--------|--------|--------|-------------|-------------|-------------|-------------|-------------|-------------|-------------|-------------|-------------|-------------|--------------|--------------|--------------|--------------|--------------|--------------|--------------|--------------|--------------|--------------|-------|
| <b>Box A1+A2, 8°N</b> |         |        |        |        |             |             |             |             |             |             |             |             |             |             |              |              |              |              |              |              |              |              |              |              |       |
| SH                    |         | Feb-69 | 1969.2 | a      |             | 1.24        |             |             | 0.96        |             |             |             |             |             | 15.85        |              | 11.66        |              |              | 35.25        |              | 35.21        |              |              |       |
| AB                    | 333     | May-64 | 1964.4 | b      | 0.59        | 0.60        | 1.21        | 0.92        |             | 0.06        | 0.06        | 0.03        | 0.05        |             | 17.03        | 14.46        | 12.20        | 11.06        |              | 35.27        | 35.20        | 35.19        | 35.19        |              |       |
| SC                    |         | May-70 | 1970.4 | b      | 1.10        |             | 1.20        |             | 0.96        |             |             |             |             |             | 17.47        | 15.02        | 12.08        | 11.19        | 10.91        | 35.36        | 35.25        | 35.16        | 35.15        | 35.23        |       |
| SK14                  | 11      | Apr-85 | 1985.3 | b      |             |             |             |             |             |             |             |             |             |             | 17.84        | 15.46        | 12.91        | 11.44        | 11.38        | 35.19        | 35.22        | 35.21        | 35.15        | 35.17        |       |
| ME32/3                | 267     | May-95 | 1995.4 | b      |             |             |             |             |             | 0.00        | 0.00        |             | 0.00        |             |              |              |              |              |              |              |              |              |              |              |       |
| SC                    |         | Jun-72 | 1972.5 | c      |             | 1.16        |             |             | 0.91        |             |             |             |             |             | 15.75        | 13.81        | 11.92        | 10.89        | 10.46        | 35.13        | 35.20        | 35.13        | 35.10        | 35.31        |       |
| OK                    |         | Jul-73 | 1973.5 | c      |             |             |             |             |             |             | 0.00        |             |             | 0.06        | 16.16        |              |              |              | 10.70        |              | 35.37        |              |              |              | 35.17 |
| OK                    |         | Jul-73 | 1973.5 | c      |             |             |             |             |             | 0.17        |             |             |             |             |              |              |              |              |              |              |              |              |              |              |       |
| SK24                  | 11      | Jul-86 | 1986.5 | c      |             | 0.99        | 0.52        |             |             | 0.08        | 0.00        | 0.00        |             |             | 22.81        | 16.54        | 12.86        |              |              | 35.20        | 35.25        | 35.23        |              |              |       |
| SK24                  | 12      | Jul-86 | 1986.5 | c      |             |             |             |             |             |             |             |             |             |             | 16.37        | 12.96        |              |              | 10.72        |              | 35.40        | 35.32        |              | 35.27        |       |
| SK24                  | 13      | Jul-86 | 1986.5 | c      | 0.77        | 0.91        | 1.54        |             | 1.30        | 0.00        | 0.00        | 0.00        |             | 0.00        | 20.52        | 15.93        | 12.87        |              | 10.86        | 35.61        | 35.45        | 35.29        |              | 35.24        |       |
| WOCE IR1W             | 26      | Aug-93 | 1993.6 | c      |             |             |             |             |             |             |             |             |             |             | 20.06        | 15.80        | 12.34        | 11.39        | 10.59        | 35.38        | 35.43        | 35.25        | 35.26        | 35.24        |       |
| WOCE IR1W             | 27      | Aug-93 | 1993.6 | c      |             |             |             |             |             |             |             |             |             |             | 19.64        | 14.99        | 12.25        | 11.24        | 10.62        | 35.61        | 35.38        | 35.20        | 35.21        | 35.24        |       |
| WOCE IR1W             | 28      | Aug-93 | 1993.6 | c      |             |             |             |             |             |             |             |             |             |             | 19.86        | 15.82        | 12.53        | 11.56        | 10.95        | 35.67        | 35.38        | 35.28        | 35.29        | 35.29        |       |
| TN39                  | 6       | Sep-94 | 1994.7 | c      |             |             |             |             |             | 0.01        | 0.01        | 0.01        | 0.00        | 0.01        | 19.34        | 14.79        | 12.10        |              |              | 35.55        | 35.27        | 35.21        |              |              |       |
| ME32/5                | 400     | Jul-95 | 1995.5 | c      |             |             |             |             |             | 0.01        | 0.01        | 0.00        | 0.00        | 0.00        | 16.41        |              | 12.13        | 11.27        | 10.69        | 35.26        |              | 35.17        | 35.17        | 35.22        |       |
| WOCE I01W             | 932     | Sep-95 | 1995.7 | c      |             |             |             |             |             | 0.01        | 0.01        |             | 0.01        | 0.01        | 17.48        | 14.27        | 12.12        | 11.24        | 10.58        | 35.47        | 35.27        | 35.23        | 35.26        | 35.25        |       |
| WOCE I01W             | 933     | Sep-95 | 1995.7 | c      |             |             |             |             |             | 0.01        | 0.01        | 0.01        | 0.01        | 0.01        | 16.81        | 13.07        | 12.30        | 11.49        | 10.82        | 35.41        | 35.27        | 35.22        | 35.28        | 35.29        |       |
| WOCE I01W             | 934     | Sep-95 | 1995.7 | c      |             |             |             |             |             | 0.01        | 0.01        | 0.01        | 0.01        | 0.01        | 17.84        | 13.15        | 12.41        | 11.53        | 10.78        | 35.56        | 35.31        | 35.24        | 35.30        | 35.31        |       |
| <b>Medians</b>        |         |        |        |        | <b>0.77</b> | <b>0.99</b> | <b>1.21</b> | <b>0.92</b> | <b>0.96</b> | <b>0.01</b> | <b>0.01</b> | <b>0.01</b> | <b>0.01</b> | <b>0.01</b> | <b>17.84</b> | <b>15.02</b> | <b>12.28</b> | <b>11.27</b> | <b>10.72</b> | <b>35.38</b> | <b>35.27</b> | <b>35.22</b> | <b>35.21</b> | <b>35.24</b> |       |
| <b>n</b>              |         |        |        |        | <b>3</b>    | <b>5</b>    | <b>4</b>    | <b>1</b>    | <b>4</b>    | <b>10</b>   | <b>10</b>   | <b>7</b>    | <b>7</b>    | <b>7</b>    | <b>15</b>    | <b>15</b>    | <b>16</b>    | <b>11</b>    | <b>13</b>    | <b>15</b>    | <b>15</b>    | <b>16</b>    | <b>11</b>    | <b>13</b>    |       |
| <b>Box B1, 10°N</b>   |         |        |        |        |             |             |             |             |             |             |             |             |             |             |              |              |              |              |              |              |              |              |              |              |       |
| AT                    | 575     | Mar-65 | 1965.2 | a      | 0.03        | 0.47        | 0.87        | 0.85        | 0.74        | 0.11        | 0.08        | 0.12        |             |             | 16.81        | 14.35        | 12.56        | 11.31        | 10.90        | 35.53        | 35.40        | 35.30        | 35.18        | 35.27        |       |
| AT                    | 576     | Mar-65 | 1965.2 | a      | 0.92        |             | 1.19        | 0.34        | 0.48        | 0.07        | 0.21        | 0.02        |             |             | 15.57        | 14.12        | 12.31        | 11.51        | 10.92        | 35.29        | 35.31        | 35.28        | 35.28        | 35.29        |       |
| SH                    |         | Feb-69 | 1969.2 | a      |             | 0.55        | 0.72        |             |             |             |             |             |             |             | 15.90        | 13.58        |              |              |              | 35.46        | 35.32        |              |              |              |       |
| TN43                  | S15     | Jan-95 | 1995.1 | a      |             |             |             |             |             | 0.01        | 0.00        | 0.00        | 0.00        | 0.00        |              | 14.72        | 12.67        | 11.69        | 11.20        |              | 35.37        | 35.36        | 35.35        | 35.37        |       |
| TN45                  | S15     | Mar-95 | 1995.2 | a      |             |             |             |             |             | 0.02        | 0.01        | 0.01        | 0.01        | 0.00        |              | 15.89        | 13.12        | 11.88        | 11.33        |              | 35.42        | 35.37        | 35.33        | 35.38        |       |
| AB                    | 332     | May-64 | 1964.4 | b      |             | 0.07        | 0.24        | 0.88        |             | 0.11        | 0.06        | 0.08        | 0.08        |             | 19.90        | 16.08        | 12.77        | 11.57        |              | 35.57        | 35.42        | 35.34        | 35.28        |              |       |
| OK                    |         | May-73 | 1973.4 | b      |             |             |             |             |             |             | 0.17        |             |             |             |              | 16.30        |              |              |              |              | 35.35        |              |              |              |       |
| VE22                  | 6772    | Apr-80 | 1980.3 | b      |             |             |             |             |             | 0.00        | 0.00        | 0.00        | 0.00        | 0.00        | 20.31        | 15.91        | 12.49        | 11.47        | 10.96        |              | 35.62        | 35.37        | 35.33        | 35.39        |       |
| SK14                  | 32      | Apr-85 | 1985.3 | b      | 0.35        | 0.30        | 0.77        | 0.86        | 0.52        | 0.00        | 0.00        | 0.00        | 0.00        | 0.00        | 19.19        | 15.49        | 12.68        | 11.95        | 11.16        | 35.70        | 35.47        | 35.32        | 35.37        | 35.33        |       |
| ME32/3 means          | 258-265 | May-95 | 1995.4 | b      |             |             |             |             |             | 0.02        | 0.01        | 0.00        | 0.00        | 0.00        | 20.11        | 15.89        | 13.12        | 12.11        | 11.19        | 35.57        | 35.25        | 35.26        | 35.34        | 35.32        |       |
| SONNE 119             | 10      | May-97 | 1997.4 | b      |             |             |             |             |             | 0.04        | 0.02        | 0.00        |             |             | 21.08        | 16.41        | 13.20        |              |              | 35.57        | 35.29        | 35.22        |              |              |       |
| VI                    | A       | Sep-59 | 1959.7 | c      | 0.13        | 0.21        | 0.46        | 0.46        | 0.43        |             |             |             |             |             | 19.40        |              | 12.74        | 11.22        | 10.59        | 35.61        |              | 35.20        | 35.12        | 35.17        |       |
| VI                    | B       | Sep-59 | 1959.7 | c      | 0.20        | 0.27        |             | 0.50        | 0.47        |             |             |             |             |             |              | 16.09        | 12.93        | 11.21        |              |              | 35.41        | 35.26        | 35.26        | 35.26        |       |
| AT                    | 99      | Sep-63 | 1963.7 | c      | 0.28        | 0.22        |             | 1.05        | 0.32        |             |             |             |             |             | 19.44        | 15.62        | 12.92        | 11.70        | 11.21        | 35.44        | 35.32        | 35.29        | 35.26        | 35.33        |       |
| SC                    |         | Jun-70 | 1970.5 | c      |             | 0.62        |             |             |             |             |             |             |             |             | 20.35        |              | 13.22        |              |              | 35.48        |              | 35.27        |              |              |       |
| SC                    |         | Jun-72 | 1972.5 | c      |             | 0.54        |             |             | 0.40        |             |             |             |             |             | 18.64        | 14.99        | 12.52        | 11.48        | 10.84        | 35.45        | 35.22        |              |              |              |       |
| SH                    |         | Jun-72 | 1972.5 | c      |             | 0.50        |             |             |             |             |             |             |             |             |              | 17.96        | 13.40        | 11.88        | 11.25        |              | 35.40        | 35.24        | 35.22        | 35.33        |       |
| SC                    |         | Aug-72 | 1972.6 | c      |             | 0.44        |             |             |             |             |             |             |             |             |              |              |              |              |              |              |              |              |              |              |       |
| SH                    |         | Jun-73 | 1973.5 | c      | 0.46        | 0.23        |             |             | 0.57        |             |             |             |             |             | 18.91        | 15.87        | 12.98        | 11.60        | 11.09        | 35.53        | 35.39        | 35.36        |              |              |       |
| SK01                  | 88      | Aug-83 | 1983.6 | c      | 0.19        | 0.21        | 0.45        | 0.48        | 0.54        | 0.00        | 0.00        | 0.00        | 0.00        | 0.00        | 18.97        | 16.16        | 13.03        | 11.72        | 11.18        | 35.57        | 35.35        | 35.37        | 35.33        | 35.36        |       |
| TN39                  | 8       | Sep-94 | 1994.7 | c      |             |             |             |             |             | 0.01        | 0.01        | 0.01        | 0.01        | 0.00        | 18.22        | 14.92        | 12.98        |              |              | 35.50        | 35.33        | 35.36        |              |              |       |
| TN49                  | S15     | Aug-95 | 1995.6 | c      |             |             |             |             |             | 0.01        | 0.00        | 0.00        | 0.00        | 0.00        | 17.75        | 14.91        | 12.82        | 11.80        | 11.12        | 35.43        | 35.29        | 35.31        | 35.34        | 35.35        |       |
| TN50                  | S15     | Aug-95 | 1995.6 | c      |             |             |             |             |             | 0.02        | 0.01        | 0.01        | 0.01        | 0.00        | 15.39        | 12.60        | 11.73        | 11.15        |              |              | 35.31        | 35.35        | 35.34        | 35.27        |       |
| WOCE I7N              | 785     | Aug-95 | 1995.6 | c      |             |             |             |             |             | 0.01        | 0.00        |             | 0.00        | 0.00        | 20.44        | 16.19        |              | 11.69        | 11.06        | 35.70        | 35.46        |              | 35.34        | 35.32        |       |
| WOCE I7N              | 786     | Aug-95 | 1995.6 | c      |             |             |             |             |             |             | 0.00        | 0.00        | 0.00        |             |              |              |              |              |              |              |              |              |              |              |       |
| SK04                  | 189     | Nov-83 | 1983.8 | d      |             |             |             |             |             |             |             |             |             | 0.57        |              |              |              |              |              |              |              |              |              |              |       |
| TN53                  | S15     | Nov-95 | 1995.8 | d      |             |             |             |             |             |             | 0.00        |             | 0.02        | 0.02        | 13.63        | 11.99        | 11.73        | 10.70        |              |              | 35.33        | 35.33        | 35.36        | 35.33        |       |
| TN54                  | S15     | Dec-95 | 1995.9 | d      |             |             |             |             |             |             | 0.03        | 0.00        | 0.00        | 0.01        | 14.12        | 12.17        | 11.46        | 10.97        |              |              | 35.30        | 35.32        | 35.35        | 35.36        |       |
| <b>Medians</b>        |         |        |        |        | <b>0.24</b> | <b>0.30</b> | <b>0.72</b> | <b>0.68</b> | <b>0.48</b> | <b>0.02</b> | <b>0.01</b> | <b>0.00</b> | <b>0.00</b> | <b>0.00</b> | <b>19.19</b> | <b>15.62</b> | <b>12.80</b> | <b>11.69</b> | <b>11.11</b> | <b>35.53</b> | <b>35.35</b> | <b>35.32</b> | <b>35.33</b> | <b>35.33</b> |       |
| <b>n</b>              |         |        |        |        | <b>8</b>    | <b>13</b>   | <b>7</b>    | <b>8</b>    | <b>9</b>    | <b>14</b>   | <b>18</b>   | <b>15</b>   | <b>14</b>   | <b>14</b>   | <b>17</b>    | <b>23</b>    | <b>22</b>    | <b>20</b>    | <b>18</b>    | <b>16</b>    | <b>23</b>    | <b>21</b>    | <b>18</b>    | <b>17</b>    |       |
| <b>Box B2, 10°N</b>   |         |        |        |        |             |             |             |             |             |             |             |             |             |             |              |              |              |              |              |              |              |              |              |              |       |
| AT                    | 577     | Mar-65 | 1965.2 | a      | 0.03        | 0.41        | 1.19        | 1.17        | 0.69        | 0.07        | 0.04        | 0.03        |             |             | 16.80        | 14.36        | 12.49        | 11.53        | 11.02        | 35.25        | 35.14        | 35.18        | 35.17        | 35.22        |       |
| AT                    | 578     | Mar-65 | 1965.2 | a      | 0.11        | 0.24        | 1.02        | 1.19        | 1.21        | 0.02        | 0.00        | 0.00        |             |             | 19.04        | 15.57        | 13.25        | 11.88        | 11.18        | 35.44        | 35.14        | 35.25        | 35.24        | 35.27        |       |
| GV102                 | 2329    | Jan-82 | 1982.1 | a      |             |             |             |             |             |             |             |             |             |             |              |              |              |              |              |              |              |              |              |              |       |

Table S1b

| Ship                | Sta     | Date   | dYear  | Season | 150mO | 200mO       | 300mO       | 400mO       | 500mO       | 150mN       | 200mN       | 300mN       | 400mN       | 500mN       | 150mT       | 200mT        | 300mT        | 400mT        | 500mT        | 150mS        | 200mS        | 300mS        | 400mS        | 500mS        |              |       |       |
|---------------------|---------|--------|--------|--------|-------|-------------|-------------|-------------|-------------|-------------|-------------|-------------|-------------|-------------|-------------|--------------|--------------|--------------|--------------|--------------|--------------|--------------|--------------|--------------|--------------|-------|-------|
| PI                  |         | May-73 | 1973.4 | b      |       |             |             |             |             | 0.00        |             |             |             |             | 15.30       |              |              |              | 11.52        |              | 35.52        |              |              | 35.35        |              |       |       |
| PI                  |         | May-73 | 1973.4 | b      |       |             |             |             |             | 0.00        |             |             |             |             | 17.01       |              |              |              | 12.16        |              | 35.53        |              |              | 35.41        |              |       |       |
| SK91                | 11      | Apr-94 | 1994.3 | b      |       | 0.38        | 0.50        | 0.67        | 0.35        |             |             |             |             |             | 15.68       | 13.35        | 12.14        |              | 11.34        |              | 35.36        | 35.40        | 35.37        | 35.34        |              |       |       |
| SK91                | CTD7    | Apr-94 | 1994.3 | b      |       |             |             |             |             | 0.00        | 0.00        | 0.00        | 0.00        | 0.00        | 17.98       | 15.06        | 13.07        | 12.07        | 11.37        |              | 35.69        | 35.52        | 35.47        | 35.45        | 35.42        |       |       |
| ME32/3              | 256     | May-95 | 1995.4 | b      |       |             |             |             |             | 0.06        | 0.42        |             |             |             | 20.40       | 16.87        | 13.50        | 11.88        | 11.63        |              | 35.75        | 35.66        | 35.48        | 35.35        | 35.45        |       |       |
| PI                  |         | Jun-70 | 1970.5 | c      |       |             |             |             |             |             |             |             |             |             |             |              |              |              |              |              |              |              |              |              |              |       |       |
| SC                  |         | Jun-70 | 1970.5 | c      |       |             |             |             |             |             | 0.06        |             |             |             |             |              |              |              |              |              |              |              |              |              |              |       |       |
| SC                  |         | Jul-71 | 1971.5 | c      |       | 0.28        |             |             | 0.27        |             |             |             |             |             | 19.84       | 15.85        | 12.80        | 11.96        | 11.51        |              |              |              |              |              |              |       |       |
| SC                  |         | Jun-72 | 1972.5 | c      |       | 0.25        |             |             | 0.39        |             |             |             |             |             | 21.08       | 16.88        | 13.95        | 12.31        | 11.56        |              | 35.68        | 35.43        | 35.50        | 35.42        | 35.38        |       |       |
| SC                  |         | Aug-72 | 1972.6 | c      |       |             |             |             | 0.33        |             |             |             |             | 0.54        | 21.28       | 17.41        | 13.17        | 12.14        | 11.42        |              | 35.77        | 35.73        | 35.36        | 35.36        | 35.38        |       |       |
| TN39                | 10      | Sep-94 | 1994.7 | c      |       |             |             |             |             | 0.01        | 2.97        | 0.00        | 0.00        | 0.00        | 21.16       | 17.34        | 13.78        |              |              |              | 35.89        | 35.75        | 35.58        |              |              |       |       |
| ME32/5              | 409     | Jul-95 | 1995.5 | c      |       |             |             |             |             | 0.02        | 0.01        |             |             |             | 21.68       | 17.77        |              |              |              |              | 35.86        | 35.67        |              |              |              |       |       |
| SK104               | 32      | Jul-95 | 1995.5 | c      |       |             |             |             |             | 0.01        | 3.54        | 0.00        |             |             | 21.03       | 16.99        | 14.18        |              |              |              | 35.77        | 35.54        | 35.58        |              |              |       |       |
| TN49                | S13     | Aug-95 | 1995.6 | c      |       |             |             |             |             | 0.03        | 0.01        | 0.00        | 0.00        | 0.00        | 21.30       | 14.48        | 13.41        | 12.00        | 11.55        |              | 35.88        | 35.64        | 35.52        | 35.41        | 35.47        |       |       |
| TN50                | S13     | Sep-95 | 1995.7 | c      |       |             |             |             |             |             | 1.00        |             |             |             |             | 17.23        |              |              |              |              |              | 35.64        |              |              |              |       |       |
| TN53                | S13     | Nov-95 | 1995.8 | d      |       |             |             |             |             | 1.00        | 0.10        | 0.00        | 0.00        | 0.00        |             | 15.18        | 12.90        | 11.90        | 11.28        |              |              | 35.61        | 35.47        | 35.42        | 35.42        |       |       |
| <b>Medians</b>      |         |        |        |        |       | <b>0.39</b> | <b>0.27</b> | <b>0.36</b> | <b>0.44</b> | <b>0.36</b> | <b>0.03</b> | <b>0.04</b> | <b>0.00</b> | <b>0.00</b> | <b>0.00</b> | <b>20.12</b> | <b>15.98</b> | <b>13.26</b> | <b>11.96</b> | <b>11.45</b> | <b>35.72</b> | <b>35.61</b> | <b>35.48</b> | <b>35.40</b> | <b>35.41</b> |       |       |
| <b>n</b>            |         |        |        |        |       | <b>2</b>    | <b>6</b>    | <b>3</b>    | <b>3</b>    | <b>6</b>    | <b>12</b>   | <b>18</b>   | <b>11</b>   | <b>13</b>   | <b>12</b>   | <b>14</b>    | <b>23</b>    | <b>18</b>    | <b>15</b>    | <b>16</b>    | <b>14</b>    | <b>21</b>    | <b>17</b>    | <b>14</b>    | <b>15</b>    |       |       |
| <b>Box C2, 12°N</b> |         |        |        |        |       |             |             |             |             |             |             |             |             |             |             |              |              |              |              |              |              |              |              |              |              |       |       |
| VE22                | 6759    | Mar-80 | 1980.4 | a      |       |             |             |             |             | 0.00        | 0.00        | 0.00        |             | 0.00        | 18.23       | 15.45        | 12.77        | 12.76        |              | 35.50        | 35.34        | 35.32        |              |              |              |       |       |
| GV54                | MX33    | May-79 | 1979.4 | b      |       | 0.47        | 0.13        | 0.18        | 0.20        | 0.00        | 0.00        | 0.00        |             | 0.00        |             |              |              |              |              |              |              |              |              |              |              |       |       |
| GV75                | 1527    | May-80 | 1980.4 | b      |       |             | 0.33        |             | 1.80        | 0.40        |             |             |             | 0.02        | 17.75       | 15.65        |              |              |              |              | 35.46        | 35.34        |              |              |              |       |       |
| SK91                | 9       | Apr-94 | 1994.3 | b      |       |             | 0.40        | 0.32        | 0.28        | 0.27        |             |             |             | 0.00        | 16.90       | 13.59        | 12.12        | 11.37        |              |              | 34.62        | 34.76        | 35.28        | 35.29        |              |       |       |
| GV55                | MX106   | Jun-79 | 1979.5 | c      |       | 0.54        | 0.56        |             | 0.77        | 0.00        | 0.00        | 0.00        | 0.00        | 0.00        | 18.85       | 15.65        | 13.09        | 12.06        | 11.41        |              | 35.58        | 35.40        | 35.38        | 35.40        | 35.38        |       |       |
| GV82                | 1804    | Nov-80 | 1980.8 | d      |       | 0.36        | 0.37        |             |             | 0.04        | 0.08        | 0.47        | 0.13        | 0.06        | 17.32       | 15.43        | 12.76        | 11.96        | 11.22        |              | 35.56        | 35.61        | 35.46        | 35.51        | 35.55        |       |       |
| <b>Medians</b>      |         |        |        |        |       | <b>0.47</b> | <b>0.37</b> | <b>0.25</b> | <b>1.04</b> | <b>0.34</b> | <b>0.00</b> | <b>0.00</b> | <b>0.00</b> | <b>0.01</b> | <b>0.00</b> | <b>17.99</b> | <b>15.65</b> | <b>12.93</b> | <b>12.09</b> | <b>11.37</b> | <b>35.53</b> | <b>35.34</b> | <b>35.35</b> | <b>35.40</b> | <b>35.38</b> |       |       |
| <b>n</b>            |         |        |        |        |       | <b>3</b>    | <b>5</b>    | <b>2</b>    | <b>2</b>    | <b>4</b>    | <b>4</b>    | <b>6</b>    | <b>5</b>    | <b>4</b>    | <b>6</b>    | <b>4</b>     | <b>5</b>     | <b>4</b>     | <b>4</b>     | <b>3</b>     | <b>4</b>     | <b>5</b>     | <b>4</b>     | <b>3</b>     | <b>3</b>     |       |       |
| <b>Box D1, 15°N</b> |         |        |        |        |       |             |             |             |             |             |             |             |             |             |             |              |              |              |              |              |              |              |              |              |              |       |       |
| VE22                | 6748    | Mar-80 | 1980.2 | a      |       |             |             |             |             | 4.44        | 0.00        | 0.00        |             | 0.00        | 17.57       | 15.47        | 13.74        | 12.31        | 11.55        |              | 35.82        | 35.75        | 35.80        | 35.66        | 35.61        |       |       |
| GV103               | 2350    | Feb-82 | 1982.2 | a      |       |             |             |             |             |             | 3.37        | 0.21        | 0.00        | 0.00        |             | 14.80        | 12.84        | 12.12        | 11.50        |              |              | 35.48        | 35.44        | 35.44        | 35.46        |       |       |
| GV114               | 2528    | Dec-82 | 1982.9 | a      |       |             |             |             |             |             | 0.71        | 0.00        | 0.00        | 0.00        |             | 16.82        | 12.95        | 11.95        | 11.71        |              |              | 35.95        | 35.52        | 35.52        | 35.51        |       |       |
| GV114               | 2530    | Dec-82 | 1982.9 | a      |       |             |             |             |             |             | 0.00        | 0.00        | 0.00        | 0.00        |             | 16.11        | 14.30        | 12.66        |              |              |              | 35.83        | 35.89        | 35.66        | 35.54        |       |       |
| GV114               | 2532    | Dec-82 | 1982.9 | a      |       |             |             |             |             | 0.00        | 0.00        | 1.67        | 0.00        | 0.00        |             | 18.56        | 16.61        | 14.53        | 13.14        | 12.00        |              | 35.77        | 35.83        | 35.95        | 35.79        | 35.67 |       |
| SK13B               | 40      | Mar-85 | 1985.2 | a      |       |             |             |             |             | 0.00        | 4.00        | 0.00        | 0.00        | 0.00        |             | 17.25        |              | 12.96        | 11.89        | 11.39        |              | 35.70        |              | 35.47        | 35.38        | 35.39 |       |
| UM                  | 5       | Jan-93 | 1993.1 | a      |       |             |             |             |             | 0.34        | 3.12        |             |             |             |             | 18.70        | 16.88        |              |              |              |              | 35.93        | 35.99        |              |              |       |       |
| TN43                | S10     | Jan-95 | 1995.1 | a      |       |             |             |             |             | 0.00        | 0.00        | 1.12        | 0.00        | 0.00        |             | 16.24        | 16.49        | 14.18        | 12.99        | 12.23        |              | 35.64        | 35.64        | 35.69        | 35.63        | 35.62 |       |
| TN43                | S11     | Jan-95 | 1995.1 | a      |       |             |             |             |             | 0.00        | 0.00        | 0.00        | 0.01        | 0.00        |             | 16.26        | 13.61        | 12.97        | 12.01        |              |              | 35.66        | 35.67        | 35.64        | 35.57        |       |       |
| SK99 means          | DRIFT17 | Feb-95 | 1995.2 | a      |       |             |             |             |             | 0.06        | 0.90        | 2.36        | 0.05        | 0.00        |             | 18.95        | 16.63        | 13.96        | 12.86        | 12.18        |              | 35.69        | 35.73        | 35.64        | 35.61        | 35.60 |       |
| TN45                | S10     | Mar-95 | 1995.2 | a      |       |             |             |             |             | 0.50        | 4.48        | 1.73        | 0.01        | 0.00        |             | 16.87        | 13.95        | 12.66        | 11.93        |              |              | 35.69        | 35.69        | 35.69        | 35.59        | 35.56 |       |
| TN45                | S11     | Mar-95 | 1995.2 | a      |       |             |             |             |             | 3.00        | 5.28        | 2.60        | 0.01        | 0.00        |             | 20.41        | 16.59        | 13.64        | 12.39        | 11.74        |              | 35.88        | 35.65        | 35.55        | 35.52        | 35.54 |       |
| TN54                | S10     | Dec-95 | 1995.9 | a      |       |             |             |             |             | 5.21        | 3.35        | 3.01        | 0.00        | 0.00        |             | 17.51        | 16.09        | 14.15        | 12.62        | 11.85        |              | 35.68        | 35.63        | 35.73        | 35.60        | 35.56 |       |
| TN54                | S11     | Dec-95 | 1995.9 | a      |       |             |             |             |             | 6.20        | 3.44        | 2.22        | 0.04        | 0.02        |             | 18.43        | 15.86        | 13.05        | 12.40        | 11.77        |              | 35.70        | 35.63        | 35.48        | 35.49        | 35.51 |       |
| SK140               | 18      | Dec-98 | 1998.9 | a      |       | 0.06        | 0.06        | 0.05        | 0.07        | 0.08        | 3.48        | 2.64        | 2.24        | 0.00        | 0.00        |              | 16.88        | 14.92        | 13.13        | 12.20        | 11.63        |              | 35.68        | 35.61        | 35.55        | 35.53 | 35.54 |
| AB                  | 329     | May-64 | 1964.4 | b      |       | 0.02        | 0.01        |             |             |             | 1.04        | 1.62        | 1.82        | 1.10        |             | 19.73        | 17.64        | 14.52        | 12.67        | 11.04        |              | 35.79        | 35.88        | 35.85        | 35.62        | 35.51 |       |
| SK91 means          | DRIFT1  | Apr-94 | 1994.3 | b      |       | 0.32        | 0.18        |             | 0.22        | 0.28        | 0.00        | 0.00        | 1.21        | 0.00        | 0.00        |              | 18.33        | 16.79        | 14.34        | 12.77        | 11.94        |              | 35.82        | 35.86        | 35.77        | 35.63 | 35.58 |
| ME32/3              | 242     | May-95 | 1995.4 | b      |       |             |             |             |             | 0.02        | 0.02        | 0.02        |             | 0.02        |             |              |              |              |              |              |              |              |              |              |              |       |       |
| ME32/3              | 253     | May-95 | 1995.4 | b      |       |             |             |             |             | 0.03        | 0.02        |             |             | 0.03        |             |              |              |              |              |              |              |              |              |              |              |       |       |
| SS141               | 3444    | Apr-96 | 1996.3 | b      |       |             | 0.00        |             | 0.18        | 0.19        | 3.27        | 3.22        | 2.85        | 0.00        | 0.00        |              | 18.43        | 16.27        | 13.67        | 12.54        | 12.10        |              | 35.86        | 35.70        | 35.67        | 35.61 | 35.66 |
| SONNE 119           | 3       | May-97 | 1997.4 | b      |       |             |             |             |             | 0.00        | 3.92        | 3.55        |             |             |             |              |              |              |              |              |              |              |              |              |              |       |       |
| AT8                 | 67      | Aug-63 | 1963.6 | b      |       | 0.15        | 0.12        | 0.12        | 0.09        | 0.12        |             |             |             |             |             |              |              |              |              |              |              |              |              |              |              |       |       |
| SC                  |         | Jun-72 | 1972.5 | c      |       |             | 0.12        |             |             |             |             |             |             |             |             |              |              |              |              |              |              |              |              |              |              |       |       |
| SC                  |         | Aug-72 | 1972.6 | c      |       |             | 0.20        |             | 0.14        |             |             |             |             |             |             |              |              |              |              |              |              |              |              |              |              |       |       |
| SK24                | 66      | Aug-86 | 1986.6 | c      |       |             | 0.22        | 0.29        | 0.21        |             | 0.12        | 0.00        | 0.00        |             | 0.00        |              |              |              |              |              |              |              |              |              |              |       |       |
| TN39                | 12      | Sep-94 | 1994.7 | c      |       |             |             |             |             | 0.08        | 0.31        | 0.23        | 0.01        | 0.00        |             | 19.21        | 17.17        | 13.85        |              |              |              | 35.92        | 35.81        | 35.65        |              |       |       |
| ME32/5              | 414     | Jul-95 | 1995.5 | c      |       |             |             |             |             |             |             | 0.00        | 0.00        | 0.00        |             |              |              | 14.91        | 13.23        | 12.28        |              |              |              |              |              |       |       |
| ME32/5              | 419     | Jul-95 | 1995.5 | c      |       |             |             |             |             | 0.02        | 0.10        |             |             | 0.01        |             | 20.54        | 15.27        |              |              | 12.45        |              | 35.89        |              | 35.90        | 35.73        | 35.66 |       |
| SK103               | 15      | Jul-95 | 1995.5 | c      |       |             | 0.05        | 0.07        | 0.09        | 0.37        | 0.41        | 2.17        | 0.08        | 0.00        |             | 20.12        | 17.22        | 14.49        | 13.38        | 12.24        |              | 35.82        | 35.77        | 35.77        | 35.74        | 35.62 |       |
| SK103               | 16      | Jul-95 | 1995.5 | c      |       | 0.24        |             | 0.09        | 0.13        | 0.09        | 5.25        | 2.02        | 0.06        | 0.00        |             | 17.32        | 14.97        | 12.84        | 11.96        |              |              | 35.65        | 35.79        | 35.56        | 35.55        |       |       |
| TN49                | S11     | Jul-95 | 1995.5 | c      |       |             |             |             |             |             |             |             |             |             |             |              |              | 14.68        | 13.04        | 12.16        |              |              |              |              | 35.85        | 35.72 | 35.65 |
| TN49                | S10     | Aug-95 | 1995.6 | c      |       |             |             |             |             | 0.02        | 0.00        |             | 0.00        | 0.00        |             |              |              | 14.48        | 12.90        | 12.17        |              |              |              |              | 35.83        | 35.68 | 35.66 |
| TN49                | S11     | Aug-95 | 1995.6 | c      |       |             |             |             |             |             | 0.00        | 0.01        | 0.00        | 0.00        |             | 20.59        | 17.43        |              |              |              |              | 35.95        | 35.83        |              |              |       |       |
| TN50                | S11     | Sep-95 | 1995.7 | c      |       |             |             |             |             | 1.00        | 4.84        | 1.45        | 0.18        |             |             | 20.49        | 16.98        | 14.57        | 13.10        | 11.82        |              | 35.83        | 35.71        | 35.81        | 35.67        | 35.52 |       |
| SK115               | 3       | Aug-96 | 1996.6 | c      |       | 0.31        | 0.09        | 0.00        | 0.09        | 0.14        | 0.00        | 3.52        | 2.25        |             | 0.00        | 18.88        | 17.40        | 14.47        | 13.01        |              |              | 35.53        | 35.72        | 35.81        | 35.70        |       |       |
| SK209               | 23      | Sep-04 | 2004.7 | c      |       |             | 0.15        | 0.04        | 0.05        | 0.12        |             |             |             |             |             |              |              |              |              |              |              |              |              |              |              |       |       |



Table S1b

| Ship                | Sta     | Date   | dYear  | Season | 150mO       | 200mO       | 300mO       | 400mO       | 500mO       | 150mN       | 200mN       | 300mN       | 400mN       | 500mN       | 150mT        | 200mT        | 300mT        | 400mT        | 500mT        | 150mS        | 200mS        | 300mS        | 400mS        | 500mS        |       |
|---------------------|---------|--------|--------|--------|-------------|-------------|-------------|-------------|-------------|-------------|-------------|-------------|-------------|-------------|--------------|--------------|--------------|--------------|--------------|--------------|--------------|--------------|--------------|--------------|-------|
| SS128               | 3258    | Jan-95 | 1995.1 | a      | 0.06        | 0.09        | 0.07        | 0.09        | 0.15        | 2.07        | 5.00        | 2.33        | 0.03        | 0.02        | 19.48        | 16.51        | 13.45        | 12.35        | 11.61        | 35.76        | 35.41        | 35.53        | 35.52        | 35.49        |       |
| SS128               | 3259    | Jan-95 | 1995.1 | a      |             | 0.07        | 0.06        | 0.07        | 0.09        | 3.66        | 4.52        | 3.05        | 0.04        | 0.00        |              |              |              |              |              |              |              |              |              |              |       |
| TN45                | M1      | Mar-95 | 1995.2 | a      |             |             |             |             |             | 2.00        | 4.58        | 3.57        | 0.03        | 0.01        |              | 16.61        | 13.72        | 12.35        | 11.80        |              | 35.63        | 35.55        | 35.45        | 35.49        |       |
| TN54                | M1      | Dec-95 | 1995.9 | a      |             |             |             |             |             |             | 3.83        | 2.12        | 0.01        | 0.01        |              | 16.01        | 13.51        | 12.41        | 11.74        |              | 35.71        | 35.60        | 35.54        | 35.52        |       |
| SK140               | 16      | Dec-98 | 1998.9 | a      | 0.07        | 0.07        | 0.07        | 0.07        | 0.10        | 3.40        | 1.76        | 0.00        | 0.00        | 0.00        | 16.18        | 14.61        | 12.61        | 12.07        | 11.55        | 35.62        | 35.57        | 35.45        | 35.50        | 35.50        |       |
| SK140               | 17      | Dec-98 | 1998.9 | a      | 0.04        | 0.05        | 0.07        | 0.07        | 0.13        | 2.14        | 2.86        | 0.72        | 0.01        | 0.00        | 16.84        | 14.87        | 13.24        | 12.22        | 11.51        | 35.67        | 35.61        | 35.58        | 35.52        | 35.49        |       |
| SK140               | 27A     | Dec-98 | 1998.9 | a      | 0.04        | 0.09        | 0.11        | 0.11        | 0.15        | 2.50        | 2.84        | 0.00        | 0.00        | 0.00        | 16.18        | 14.70        | 12.78        | 12.11        | 11.48        | 35.68        | 35.62        | 35.49        | 35.49        | 35.47        |       |
| SK140               | 27B     | Dec-98 | 1998.9 | a      | 0.04        | 0.09        | 0.11        | 0.11        |             | 2.82        | 2.30        |             | 0.00        |             | 16.53        | 15.19        |              | 12.08        |              | 35.57        | 35.66        |              | 35.48        |              |       |
| VI                  | 4712    | Apr-60 | 1960.3 | b      | 0.21        | 0.16        | 0.19        | 0.16        | 0.17        |             |             |             |             |             | 19.90        | 16.42        | 13.83        | 12.38        | 11.68        | 35.70        | 35.55        | 35.56        | 35.45        | 35.44        |       |
| GA54                | 59      | May-79 | 1979.4 | b      |             |             |             | 0.06        | 0.05        |             |             |             |             |             |              |              |              |              |              |              |              |              | 35.64        |              |       |
| GV54                | 58      | May-79 | 1979.4 | b      |             |             |             |             |             |             |             |             |             |             |              |              |              |              |              |              |              | 35.62        | 35.64        |              |       |
| GV75                | 1521    | May-80 | 1980.4 | b      |             | 0.08        |             | 0.60        | 0.33        |             | 2.82        | 1.25        | 0.08        | 0.00        | 20.86        | 17.13        |              |              |              | 35.86        | 35.58        |              |              |              |       |
| GV91                | 1985    | Apr-81 | 1981.3 | b      |             |             |             |             |             |             | 0.62        |             |             | 0.00        | 18.60        |              |              |              |              | 35.62        |              |              |              |              |       |
| GV118               | 2688    | Apr-83 | 1983.3 | b      |             |             |             |             |             | 0.03        | 3.98        | 3.14        | 0.59        | 0.12        |              |              |              |              |              |              |              |              |              |              |       |
| GV118               | 2689    | Apr-83 | 1983.3 | b      |             |             |             |             |             | 0.88        | 3.99        | 0.32        | 0.00        | 0.12        |              |              |              |              |              |              |              |              |              |              |       |
| SS141               | 3442    | May-96 | 1996.4 | b      |             |             |             |             |             |             |             |             |             |             | 19.44        | 17.20        | 14.02        | 12.74        | 11.97        | 35.86        | 35.83        | 35.68        | 35.61        | 35.58        |       |
| SS141               | 3443    | May-96 | 1996.4 | b      |             |             |             |             |             | 2.39        | 2.28        | 2.99        | 0.28        | 0.00        | 19.07        | 16.92        | 13.83        | 12.52        | 11.95        | 35.86        | 35.83        | 35.73        | 35.63        | 35.62        |       |
| AT8                 | 68      | Aug-63 | 1963.6 | c      |             | 0.08        | 0.13        |             | 0.07        |             |             |             |             |             | 21.13        | 17.59        | 14.11        |              | 11.93        | 35.95        | 35.57        | 35.73        |              | 35.63        |       |
| AT8                 | 69      | Aug-63 | 1963.6 | c      | 0.13        | 0.09        |             | 0.15        | 0.17        | 0.04        |             | 1.30        | 0.16        | 0.04        | 19.82        | 16.89        | 14.18        | 12.50        | 11.75        | 35.65        | 35.58        | 35.74        | 35.55        | 35.20        |       |
| SK01                | 96      | Aug-83 | 1983.6 | c      |             |             |             | 0.21        | 0.25        | 2.66        | 3.99        | 1.41        | 0.00        | 0.00        | 19.16        | 16.84        | 13.83        | 12.52        | 11.69        | 35.74        | 35.63        | 35.68        | 35.55        | 35.50        |       |
| SK24                | 70      | Jul-86 | 1986.6 | c      |             |             |             |             |             | 0.00        | 3.40        | 0.00        | 0.00        | 0.00        | 20.95        | 17.05        | 15.47        |              | 11.73        | 36.08        | 35.60        | 35.64        |              | 35.57        |       |
| SK24                | 68      | Aug-86 | 1986.6 | c      | 0.87        |             |             |             | 0.16        | 0.00        | 1.59        | 1.67        |             | 0.00        | 20.93        | 17.95        | 14.90        | 12.18        |              | 35.98        | 35.68        | 35.81        |              | 35.63        |       |
| SK34                | 114     | Aug-87 | 1987.6 | c      | 0.10        | 0.13        | 0.09        | 0.18        | 0.09        | 0.00        | 0.06        | 2.16        | 0.00        | 0.00        | 19.86        | 16.69        | 13.69        | 12.73        | 11.94        | 35.92        | 35.73        | 35.56        | 35.54        | 35.51        |       |
| TN39                | 13      | Sep-94 | 1994.7 | c      |             |             |             |             |             | 0.94        | 1.40        | 0.96        | 0.00        | 0.00        | 19.70        | 16.87        | 13.99        |              |              | 35.84        | 35.70        | 35.62        |              |              |       |
| SK103               | 12      | Jun-95 | 1995.5 | c      | 0.05        | 0.05        | 0.05        | 0.05        | 0.11        | 3.88        | 4.42        | 3.35        | 0.01        | 0.00        | 18.46        | 15.80        | 13.49        | 12.43        | 11.85        | 35.76        | 35.56        | 35.52        | 35.49        | 35.50        |       |
| SK103               | 13      | Jun-95 | 1995.5 | c      | 0.07        | 0.05        | 0.07        | 0.05        | 0.11        | 1.38        | 2.28        | 2.68        | 0.03        | 0.00        | 19.19        | 16.32        | 13.87        | 12.70        | 11.86        | 35.70        | 35.61        | 35.64        | 35.57        | 35.52        |       |
| SK103               | 14      | Jun-95 | 1995.5 | c      |             | 0.05        | 0.05        | 0.05        | 0.02        |             | 3.84        | 3.83        | 0.06        | 0.00        | 19.74        | 16.63        | 13.89        | 12.59        | 11.90        | 35.78        | 35.70        | 35.65        | 35.58        | 35.57        |       |
| TN49                | M1      | Jul-95 | 1995.5 | c      |             |             |             |             |             | 4.00        | 4.97        | 0.02        | 0.00        | 0.00        |              |              | 13.64        | 12.42        | 11.80        |              | 35.62        | 35.62        | 35.42        | 35.52        |       |
| TN50                | M1      | Aug-95 | 1995.6 | c      |             |             |             |             |             | 4.00        | 5.55        |             |             |             |              | 16.51        |              |              |              |              | 35.64        |              |              |              |       |
| SS136               | 3322    | Sep-95 | 1995.7 | c      |             | 0.00        |             | 0.00        | 0.09        | 2.61        | 0.22        | 0.37        | 0.00        | 0.01        | 18.98        | 16.19        | 13.73        | 12.32        | 11.81        | 35.76        | 35.71        | 35.67        | 35.54        | 35.58        |       |
| SK209               | 26      | Sep-04 | 2004.7 | c      | 0.02        | 0.03        | 0.03        |             | 0.02        | 0.93        | 2.31        | 2.87        | 0.04        | 0.03        | 18.38        | 16.09        | 13.66        | 12.47        | 11.89        | 35.71        | 35.63        | 35.55        | 35.48        | 35.48        |       |
| SK209               | 27      | Sep-04 | 2004.7 | c      | 0.04        | 0.06        | 0.04        | 0.07        | 0.05        | 3.55        | 2.16        | 0.79        | 0.04        | 0.06        | 18.18        | 15.72        | 12.82        | 12.34        | 12.12        | 35.67        | 35.55        | 35.36        | 35.37        | 35.48        |       |
| GV59                | 1227    | Oct-79 | 1979.8 | d      |             |             |             |             |             | 1.19        | 0.74        | 3.72        |             |             | 18.00        | 16.12        | 13.76        | 12.45        |              | 35.76        | 35.77        | 35.70        | 35.63        |              |       |
| GV82                | 1786    | Nov-80 | 1980.8 | d      | 0.21        |             | 0.21        | 0.28        |             |             | 0.19        | 0.08        | 0.11        |             |              |              |              |              |              |              |              |              |              |              |       |
| SK47                | 114     | Nov-88 | 1988.8 | d      |             |             |             | 0.29        | 0.30        | 1.87        | 2.93        | 1.18        | 0.00        | 0.00        | 17.51        | 15.58        | 13.81        | 12.45        | 11.90        | 35.52        | 35.52        | 35.63        | 35.52        | 35.53        |       |
| SS150               | 3788    | Nov-96 | 1996.8 | d      | 0.07        | 0.06        | 0.11        | 0.11        | 0.19        | 5.31        | 3.40        | 0.00        | 0.00        | 0.00        | 16.99        | 14.98        | 13.16        | 12.26        | 11.46        | 35.59        | 35.60        | 35.58        | 35.55        | 35.49        |       |
| SS150               | 3789    | Nov-96 | 1996.8 | d      |             |             | 0.05        | 0.06        | 0.11        | 5.51        | 4.09        | 0.67        | 0.00        | 0.00        |              | 14.89        | 13.20        | 12.41        | 11.79        |              | 35.67        | 35.56        | 35.57        | 35.57        |       |
| <b>Medians</b>      |         |        |        |        | <b>0.07</b> | <b>0.08</b> | <b>0.09</b> | <b>0.11</b> | <b>0.13</b> | <b>1.87</b> | <b>2.85</b> | <b>1.16</b> | <b>0.01</b> | <b>0.00</b> | <b>18.85</b> | <b>16.20</b> | <b>13.71</b> | <b>12.43</b> | <b>11.79</b> | <b>35.76</b> | <b>35.64</b> | <b>35.62</b> | <b>35.54</b> | <b>35.52</b> |       |
| <b>n</b>            |         |        |        |        | <b>18</b>   | <b>22</b>   | <b>22</b>   | <b>28</b>   | <b>29</b>   | <b>37</b>   | <b>42</b>   | <b>40</b>   | <b>38</b>   | <b>37</b>   | <b>34</b>    | <b>39</b>    | <b>37</b>    | <b>34</b>    | <b>35</b>    | <b>34</b>    | <b>41</b>    | <b>39</b>    | <b>35</b>    | <b>36</b>    |       |
| <b>Box E1, 18°N</b> |         |        |        |        |             |             |             |             |             |             |             |             |             |             |              |              |              |              |              |              |              |              |              |              |       |
| SH                  |         | Feb-69 | 1969.2 | a      |             | 0.12        | 0.11        |             |             |             |             |             |             |             | 17.63        | 15.98        | 13.80        |              |              |              |              |              |              |              |       |
| AT93-17             | 2358    | Feb-77 | 1977.2 | a      | 0.07        | 0.05        | 0.08        | 0.06        | 0.07        | 0.41        | 0.41        | 3.08        | 0.30        | 0.00        | 19.35        | 17.30        | 14.90        | 13.24        |              | 35.94        | 35.87        | 35.97        | 35.71        | 35.61        |       |
| SK38                | K15     | Jan-88 | 1988.1 | a      |             |             |             |             |             |             |             |             |             |             | 20.03        | 17.26        | 14.50        |              |              | 35.98        | 35.73        | 35.73        |              |              |       |
| SK38                | K16     | Jan-88 | 1988.1 | a      |             |             |             |             |             |             |             |             |             |             | 19.56        | 16.98        | 15.56        | 13.88        | 12.42        | 36.02        | 35.82        | 36.08        | 35.91        | 35.70        |       |
| PV30                | 4357    | Mar-90 | 1990.2 | a      | 0.21        |             |             |             | 0.21        | 0.11        | 0.86        | 3.58        | 3.36        | 0.05        | 18.97        | 17.16        | 14.53        | 13.12        | 12.22        | 35.80        | 35.88        | 35.74        | 35.66        | 35.60        |       |
| PV30                | 4423    | Mar-90 | 1990.2 | a      |             |             |             |             |             | 0.34        | 0.31        | 3.57        | 1.36        | 0.29        | 19.22        | 17.14        | 14.31        | 12.86        | 12.09        | 36.03        | 35.91        | 35.77        | 35.65        | 35.60        |       |
| PV30                | 4427    | Mar-90 | 1990.2 | a      | 0.12        |             |             |             | 0.15        | 0.11        | 4.21        | 3.57        | 0.54        | 0.04        | 20.15        | 16.70        | 14.69        | 13.15        | 12.27        | 35.88        | 35.73        | 35.84        | 35.68        | 35.63        |       |
| SK99                | 14      | Feb-95 | 1995.4 | a      |             |             |             |             |             | 0.02        | 0.53        | 0.32        | 0.00        | 0.00        | 19.76        | 14.99        | 13.94        |              |              | 35.71        |              | 35.82        | 35.86        |              |       |
| SS161               | 4004    | Jan-98 | 1998.1 | a      |             | 0.12        | 0.06        |             | 0.11        |             | 0.00        | 1.81        | 1.59        | 0.13        |              | 17.77        | 14.83        | 13.41        | 12.36        |              | 36.11        | 36.01        | 35.82        | 35.71        |       |
| VI                  | 4720    | Apr-60 | 1960.3 | b      | 0.35        | 0.15        | 0.12        |             | 0.13        | 0.00        | 3.61        | 2.78        | 1.30        | 0.14        | 20.49        | 17.49        |              | 13.26        | 12.33        | 35.86        | 35.86        |              | 35.76        | 35.69        |       |
| AB                  | 328     | May-64 | 1964.4 | b      |             |             |             | 0.08        |             | 0.61        | 0.00        |             |             |             | 19.71        | 17.33        | 14.80        | 13.26        |              | 35.73        | 35.74        | 35.82        | 35.72        |              |       |
| PI                  |         | May-73 | 1973.4 | b      |             |             |             |             |             |             | 0.00        |             |             |             |              | 16.85        |              | 13.25        |              |              | 35.79        |              | 35.71        |              |       |
| SK91                | HY20    | May-94 | 1994.4 | b      |             |             |             |             |             |             |             |             |             |             | 19.14        | 16.21        |              |              |              |              | 35.92        | 36.06        |              |              |       |
| SK91                | 20      | May-94 | 1994.4 | b      |             |             | 0.10        | 0.13        | 0.14        | 0.00        | 0.34        | 0.00        | 0.00        | 0.00        | 21.13        | 18.99        | 15.71        | 13.85        | 12.82        | 36.83        | 35.96        | 36.11        | 36.10        | 35.73        |       |
| ME32/3 means        | 243-252 | May-95 | 1995.4 | b      |             |             |             |             |             | 0.04        | 3.54        | 2.86        | 2.36        | 0.21        | 20.94        | 17.54        | 15.10        | 13.57        | 11.49        | 35.94        | 35.62        | 35.82        | 35.76        | 35.57        |       |
| SC                  |         | Jul-70 | 1970.5 | c      |             |             |             |             | 0.11        |             | 10.22       |             | 4.72        |             | 20.90        | 16.88        | 14.65        | 13.25        | 12.00        | 35.95        | 35.78        | 35.67        | 35.71        | 35.62        |       |
| SC                  |         | Jul-71 | 1971.5 | c      | 0.17        |             |             | 0.19        |             |             | 19.69       | 16.77       | 14.76       | 12.97       | 11.94        | 19.69        | 16.77        | 14.76        | 12.97        | 11.94        | 35.86        | 36.09        | 36.09        | 35.83        | 35.65 |
| SC                  |         | Aug-72 | 1972.6 | c      |             | 0.15        |             | 0.15        |             |             | 19.70       | 16.86       | 14.94       | 13.17       | 12.16        | 19.70        | 16.86        | 14.94        | 13.17        | 12.16        | 36.09        | 36.02        | 35.94        | 35.71        | 35.67 |
| SK34                | K16     | Jun-87 | 1987.5 | c      | 0.12        |             | 0.10        | 0.09        |             | 0.00        | 4.30        | 3.23        | 1.03        |             | 19.01        | 16.80        | 14.61        | 13.13        | 12.07        | 35.74        | 35.67        | 35.79        | 35.70        | 35.58        |       |
| SK34                | K15     | Jun-87 | 1987.5 | c      | 0.23        | 0.11        |             |             |             | 0.00        | 0.00        | 2.95        |             |             | 19.58        | 18.75        |              |              |              |              |              |              |              |              |       |

Table S1b

| Ship                | Sta            | Date   | dYear  | Season | 150mO       | 200mO       | 300mO       | 400mO       | 500mO       | 150mN       | 200mN       | 300mN       | 400mN       | 500mN       | 150mT        | 200mT        | 300mT        | 400mT        | 500mT        | 150mS        | 200mS        | 300mS        | 400mS        | 500mS        |
|---------------------|----------------|--------|--------|--------|-------------|-------------|-------------|-------------|-------------|-------------|-------------|-------------|-------------|-------------|--------------|--------------|--------------|--------------|--------------|--------------|--------------|--------------|--------------|--------------|
| SS150               | 3792           | Nov-96 | 1996.8 | d      | 0.04        | 0.06        | 0.03        | 0.04        | 0.03        | 3.87        | 4.07        | 3.63        | 0.23        | 0.07        | 17.97        | 16.42        | 14.75        | 13.52        | 12.34        | 35.80        | 35.85        | 35.91        | 35.85        | 35.73        |
|                     | <b>Medians</b> |        |        |        | <b>0.19</b> | <b>0.06</b> | <b>0.13</b> | <b>0.09</b> | <b>0.11</b> | <b>0.08</b> | <b>2.53</b> | <b>2.74</b> | <b>1.28</b> | <b>0.06</b> | <b>18.88</b> | <b>16.77</b> | <b>14.25</b> | <b>13.02</b> | <b>12.22</b> | <b>35.76</b> | <b>35.78</b> | <b>35.71</b> | <b>35.67</b> | <b>35.66</b> |
|                     | <b>n</b>       |        |        |        | <b>9</b>    | <b>5</b>    | <b>4</b>    | <b>5</b>    | <b>9</b>    | <b>16</b>   | <b>18</b>   | <b>15</b>   | <b>17</b>   | <b>17</b>   | <b>12</b>    | <b>16</b>    | <b>16</b>    | <b>15</b>    | <b>15</b>    | <b>13</b>    | <b>17</b>    | <b>16</b>    | <b>15</b>    | <b>15</b>    |
| <b>Box F1, 20°N</b> |                |        |        |        |             |             |             |             |             |             |             |             |             |             |              |              |              |              |              |              |              |              |              |              |
| AM                  |                | Feb-73 | 1973.2 | a      |             |             |             |             |             | 0.03        |             |             |             |             |              |              |              |              |              |              |              |              |              |              |
| AM                  |                | Mar-73 | 1973.2 | a      |             |             |             |             |             | 0.05        |             |             |             |             |              |              |              |              |              |              |              |              |              |              |
| AT                  | 2347           | Jan-77 | 1977.1 | a      | 0.14        |             |             |             |             | 0.03        | 2.85        | 2.20        | 2.44        | 2.66        | 19.83        | 17.32        | 15.16        | 13.67        | 12.40        | 35.91        | 35.78        | 35.84        | 35.72        | 35.54        |
| GEOSECS             | 416            | Dec-77 | 1977.9 | a      |             |             |             |             |             |             | 3.94        | 3.00        |             | 0.60        |              | 17.88        | 14.71        |              |              |              | 35.94        | 35.89        |              |              |
| SK38                | L15            | Jan-88 | 1988.1 | a      | 0.13        | 0.06        |             |             | 0.11        | 0.00        | 1.04        | 2.80        | 2.14        | 0.03        | 19.42        | 17.66        | 15.66        | 13.63        | 12.63        | 36.03        | 35.96        | 36.05        | 35.82        | 35.73        |
| SK38                | L14            | Jan-88 | 1988.1 | a      | 0.29        | 0.16        | 0.19        | 0.13        | 0.11        |             |             |             |             |             | 20.06        | 17.30        | 15.11        | 13.98        | 12.85        | 36.06        | 35.72        | 35.85        | 35.86        | 35.75        |
| SK47                | L15            | Dec-88 | 1988.9 | a      | 0.34        |             |             |             |             | 0.00        | 0.81        | 1.33        | 1.40        | 0.72        | 19.78        | 17.81        | 15.72        | 13.56        | 12.55        | 36.04        | 35.95        | 36.01        | 35.82        | 35.71        |
| PV30                | 4377           | Mar-90 | 1990.2 | a      |             |             | 0.10        | 0.15        | 0.14        | 3.57        | 1.79        | 3.51        | 0.11        | 0.05        | 18.75        | 16.68        | 15.15        | 13.74        | 13.01        | 35.83        | 35.96        | 35.93        | 35.81        | 35.82        |
| PV30                | 4389           | Mar-90 | 1990.2 | a      | 0.47        | 0.30        | 0.16        | 0.25        | 0.16        | 0.05        | 0.04        | 0.07        | 0.07        | 0.07        | 19.22        | 17.13        | 15.05        | 13.97        | 13.02        | 36.00        | 35.97        | 36.01        | 35.89        | 35.82        |
| PV30                | 4391           | Mar-90 | 1990.2 | a      | 0.50        | 0.25        | 0.14        | 0.14        |             | 0.01        | 0.04        | 0.01        | 0.01        | 0.73        | 19.89        | 17.97        | 15.74        | 14.20        | 13.15        | 36.08        | 35.90        | 35.95        |              | 35.81        |
| PV30                | 4393           | Mar-90 | 1990.2 | a      | 0.26        | 0.15        | 0.21        |             |             | 0.02        | 0.05        | 0.05        | 1.71        | 0.21        | 19.11        | 17.77        | 16.15        | 13.65        | 12.81        | 35.90        | 36.02        | 36.22        | 35.82        | 35.75        |
| PV30                | 4395           | Mar-90 | 1990.2 | a      | 0.68        | 0.14        |             |             |             | 0.05        | 0.09        | 1.71        | 2.07        | 2.01        | 20.67        | 18.47        | 15.48        | 13.81        | 12.75        | 36.02        | 35.92        | 35.99        | 35.86        | 35.75        |
| PV30                | 4397           | Mar-90 | 1990.2 | a      | 0.46        | 0.10        |             |             |             | 0.05        | 2.71        | 1.71        | 1.51        | 0.51        | 20.36        | 17.76        | 15.24        | 13.61        | 12.50        | 36.07        | 35.92        | 35.96        | 35.87        | 35.73        |
| PV30                | 4399           | Mar-90 | 1990.2 | a      | 0.20        | 0.24        |             | 0.10        |             | 0.06        | 0.05        | 1.57        | 1.36        | 0.43        | 18.62        | 17.00        | 15.34        | 13.98        | 12.63        | 35.76        | 35.80        | 35.94        | 35.86        | 35.73        |
| PV30                | 4401           | Mar-90 | 1990.2 | a      | 0.71        | 0.33        |             |             | 0.13        | 0.11        | 0.14        | 1.07        | 1.79        | 0.01        | 20.97        | 17.32        | 15.61        | 14.02        | 12.95        | 36.14        | 35.73        | 36.00        | 35.89        | 35.79        |
| PV30                | 4403           | Mar-90 | 1990.2 | a      | 1.81        |             |             | 0.18        | 0.19        | 0.04        | 3.86        | 0.41        | 0.03        | 0.04        | 20.90        | 18.03        | 15.37        | 14.15        | 13.00        | 36.17        | 35.95        | 35.77        | 35.93        | 35.78        |
| SS98                | 2499           | Feb-92 | 1992.2 | a      |             | 0.14        |             |             |             | 0.69        | 0.10        | 3.95        | 1.61        | 0.50        | 19.12        | 17.35        | 14.78        | 13.42        | 12.41        | 35.91        | 36.00        | 35.88        | 35.78        | 35.67        |
| TN43                | N6             | Jan-95 | 1995.1 | a      |             |             |             |             |             |             | 3.43        | 2.95        | 1.85        | 1.12        |              | 16.38        | 14.52        | 13.35        | 12.37        |              | 35.83        | 35.86        | 35.78        | 35.68        |
| SK99                | C012           | Feb-95 | 1995.2 | a      |             |             |             |             |             | 1.22        | 0.04        | 0.07        | 1.50        | 1.61        | 19.20        | 17.79        | 15.56        | 13.89        | 12.61        | 35.94        | 35.96        | 36.08        | 35.90        | 35.74        |
| TN45                | N6             | Mar-95 | 1995.2 | a      |             |             |             |             |             |             | 2.20        | 3.44        | 1.89        | 1.13        |              | 17.59        | 15.04        | 13.46        | 12.72        |              | 35.93        | 35.92        | 35.83        | 35.74        |
| TN54                | N6             | Dec-95 | 1995.9 | a      |             |             |             |             |             | 2.00        | 2.00        | 2.25        | 1.00        | 0.95        |              | 17.33        | 14.98        | 13.50        | 12.41        |              | 36.03        | 36.00        | 35.86        | 35.71        |
| SS161               | 4005           | Jan-98 | 1998.1 | a      | 0.15        | 0.06        | 0.07        | 0.07        | 0.04        | 0.00        | 1.54        | 2.29        | 2.03        | 1.30        | 18.90        | 17.13        | 15.00        | 13.35        | 12.50        | 35.83        | 35.78        | 35.99        | 35.79        | 35.73        |
| AA542               | 18             | Feb-02 | 2002.2 | a      | 0.10        | 0.10        | 0.10        | 0.10        | 0.10        | 2.74        | 4.56        | 1.10        | 0.29        | 0.00        | 18.86        | 17.41        | 15.23        | 13.80        | 12.42        | 35.84        | 35.91        | 35.98        | 35.87        | 35.68        |
| PI                  |                | May-73 | 1973.4 | b      |             |             |             |             |             |             | 0.00        |             |             | 0.68        | 20.40        | 18.18        | 15.82        | 13.84        | 12.79        | 36.17        | 35.95        | 35.97        | 35.88        | 35.71        |
| GV118               | 2694           | Apr-83 | 1983.3 | b      |             |             |             |             |             | 0.04        | 2.76        | 0.03        | 0.00        | 0.00        |              |              |              |              |              |              |              |              |              |              |
| PV30                | 4453           | Apr-90 | 1990.3 | b      | 0.34        | 0.22        | 0.26        | 0.03        |             | 0.07        | 0.09        | 0.01        | 0.93        |             | 19.65        | 17.60        | 14.73        | 13.68        | 12.89        | 36.04        | 36.10        | 35.97        | 35.92        | 35.86        |
| PV30                | 4459           | Apr-90 | 1990.3 | b      |             |             |             |             |             | 0.09        | 1.71        | 1.64        | 0.79        |             | 18.95        | 17.53        | 15.13        | 13.67        | 12.52        | 35.83        | 35.95        | 36.00        | 35.89        | 35.75        |
| PV30                | 4461           | Apr-90 | 1990.3 | b      | 0.34        | 0.26        |             | 0.27        |             | 0.03        | 0.03        | 0.25        | 0.01        |             | 19.12        | 17.60        | 15.59        | 14.06        | 13.09        | 35.80        | 35.87        | 36.11        | 35.93        | 35.86        |
| PV30                | 4463           | Apr-90 | 1990.3 | b      | 0.71        |             |             |             |             | 0.01        | 3.36        | 1.57        |             |             | 21.58        | 18.73        | 16.17        | 14.31        | 12.86        | 36.22        | 35.94        | 36.17        | 36.02        | 35.77        |
| SS119               | 3204           | Apr-94 | 1994.3 | b      | 0.18        | 0.14        | 0.12        | 0.11        | 0.09        | 0.00        | 0.00        | 0.00        | 0.00        | 0.00        |              | 17.46        | 15.25        | 13.64        | 12.44        |              | 36.13        | 36.05        | 35.87        | 35.73        |
| SK91                | HY22           | May-94 | 1994.4 | b      |             |             |             |             |             | 21.59       | 17.81       | 15.28       | 13.96       | 12.59       | 35.78        | 35.92        | 36.10        | 35.96        | 35.87        | 35.78        | 35.92        | 36.10        | 35.87        | 35.87        |
| ME32/3              | 238            | May-95 | 1995.4 | b      |             |             |             |             |             | 0.03        | 1.52        | 0.33        | 1.16        |             | 20.53        | 18.10        | 16.25        | 14.39        | 13.08        | 35.94        | 35.82        | 36.16        | 35.97        | 35.82        |
| SS141               | 3447           | May-96 | 1996.4 | b      | 0.33        | 0.18        | 0.17        |             |             | 0.10        | 0.00        | 0.10        | 1.50        | 1.60        | 21.76        | 19.33        | 16.03        | 14.20        | 12.79        | 36.25        | 35.94        | 36.22        | 36.00        | 35.82        |
| SONNE 119           | 6              | May-97 | 1997.4 | b      |             |             |             |             |             |             | 0.00        |             |             |             | 19.25        | 17.58        |              |              |              | 35.85        | 36.10        |              |              |              |
| AT                  | 77             | Aug-63 | 1963.6 | c      | 0.10        | 0.08        |             | 0.12        | 0.10        | 0.03        | 0.02        | 1.36        |             | 0.35        | 19.00        | 17.54        | 14.60        | 13.32        | 12.39        | 35.80        | 36.06        | 35.91        | 35.80        | 35.71        |
| ML                  |                | Jun-66 | 1966.5 | c      |             |             |             |             | 0.13        |             |             |             |             |             |              |              |              |              |              |              |              |              |              |              |
| SC                  |                | Jul-70 | 1970.5 | c      |             |             |             |             |             |             |             |             |             | 0.02        | 19.47        |              | 16.31        |              |              | 35.96        |              | 36.13        |              | 35.82        |
| SK34                | L15            | Jul-87 | 1987.5 | c      |             |             |             |             | 0.07        |             | 3.06        |             |             | 0.30        |              |              |              |              |              |              | 35.80        |              |              | 35.69        |
| SK34                | L14            | Jul-87 | 1987.5 | c      |             |             |             |             |             |             | 2.70        | 1.56        |             |             | 20.27        | 18.63        |              |              |              | 36.14        | 36.16        |              |              |              |
| SK103               | 25             | Jul-95 | 1995.5 | c      | 0.22        | 0.15        | 0.23        | 0.09        | 0.09        | 0.00        | 0.00        | 0.00        | 0.00        | 0.00        | 20.71        | 18.57        | 16.94        | 14.23        | 12.97        | 36.07        | 36.01        | 36.32        | 35.97        | 35.79        |
| TN49                | N6             | Jul-95 | 1995.5 | c      |             |             |             |             |             | 4.73        | 3.11        | 2.19        | 1.23        |             |              | 14.51        | 13.29        | 12.43        |              | 35.87        | 35.88        | 35.80        | 35.72        |              |
| TN50                | N6             | Aug-95 | 1995.6 | c      |             |             |             |             |             | 0.02        | 4.98        | 3.33        | 2.53        | 1.50        |              | 16.89        | 14.86        | 13.64        | 12.54        |              | 35.83        | 35.90        | 35.82        | 35.72        |
| WOCE I07N           | 815            | Aug-95 | 1995.6 | c      |             |             |             |             |             | 0.03        | 0.26        | 2.34        | 1.16        | 0.01        | 20.38        | 18.01        | 15.39        | 13.86        | 12.69        | 36.00        | 36.04        | 36.04        | 35.93        | 35.77        |
| SS136               | 3321           | Sep-95 | 1995.7 | c      | 0.03        | 0.00        | 0.09        | 0.08        | 0.09        | 0.56        | 0.03        | 1.20        | 0.70        | 0.00        | 19.69        | 17.56        | 15.56        | 13.80        | 12.64        | 35.99        | 35.98        | 36.15        | 35.94        | 35.79        |
| WOCE I07N           | 818            | Sep-95 | 1995.7 | c      |             |             |             |             |             | 0.17        | 2.13        | 0.90        | 0.15        | 0.28        | 19.90        | 17.76        | 16.61        | 13.70        | 12.63        | 36.00        | 35.95        | 36.08        | 35.89        | 35.77        |
| SK115               | 8              | Aug-96 | 1996.6 | c      | 0.22        | 0.01        | 0.05        | 0.05        |             | 0.00        | 0.00        | 1.36        | 1.76        |             | 19.53        | 17.79        | 15.45        | 13.77        |              | 36.00        | 36.12        | 36.10        | 35.90        |              |
| SK209               | 2              | Sep-04 | 2004.7 | c      | 0.04        | 0.04        | 0.01        | 0.03        | 0.04        | 0.06        | 0.03        | 0.33        | 0.06        | 0.06        | 18.63        | 17.90        | 15.45        | 13.76        | 12.58        | 35.73        | 35.98        | 35.90        | 35.71        | 35.55        |
| VI                  | 4854           | Nov-60 | 1960.8 | d      |             | 0.13        |             |             |             | 0.36        | 0.01        | 2.14        | 1.38        | 0.44        | 18.97        | 17.21        | 14.49        | 12.52        |              |              |              |              |              |              |

Table S1b

| Ship                | Sta      | Date   | dYear  | Season | 150mO       | 200mO       | 300mO       | 400mO       | 500mO       | 150mN       | 200mN       | 300mN       | 400mN       | 500mN       | 150mT        | 200mT        | 300mT        | 400mT        | 500mT        | 150mS        | 200mS        | 300mS        | 400mS        | 500mS        |       |
|---------------------|----------|--------|--------|--------|-------------|-------------|-------------|-------------|-------------|-------------|-------------|-------------|-------------|-------------|--------------|--------------|--------------|--------------|--------------|--------------|--------------|--------------|--------------|--------------|-------|
| PV30                | 4369     | Mar-90 | 1990.2 | a      | 0.33        | 0.26        | 0.37        |             |             | 0.01        | 0.02        | 0.02        |             |             | 19.24        | 17.63        | 15.48        | 13.79        | 12.84        | 35.98        | 36.00        | 36.12        | 35.90        | 35.80        |       |
| PV30                | 4371     | Mar-90 | 1990.2 | a      | 0.47        |             |             |             |             | 0.03        | 3.29        | 0.43        | 1.11        | 0.48        | 19.22        | 17.02        | 15.15        | 13.72        | 12.61        | 36.17        | 35.97        | 36.04        | 35.86        | 35.76        |       |
| PV30                | 4373     | Mar-90 | 1990.2 | a      | 0.65        |             |             |             |             | 0.04        |             | 0.53        | 2.07        | 0.52        | 20.72        | 17.66        | 16.03        | 13.80        | 12.87        | 36.12        | 35.74        | 36.13        | 35.84        | 35.79        |       |
| PV30                | 4375     | Mar-90 | 1990.2 | a      | 0.26        |             |             |             |             | 0.02        | 1.71        | 2.01        | 2.07        | 0.64        | 18.21        | 17.09        | 14.50        | 13.72        | 12.99        | 35.92        | 35.96        | 35.84        | 35.83        | 35.78        |       |
| PV30                | 4379     | Mar-90 | 1990.2 | a      | 0.21        |             | 0.16        | 0.15        |             | 0.02        | 4.14        | 0.05        | 0.03        | 0.54        | 18.42        | 17.13        | 14.86        | 14.00        | 13.05        | 35.86        | 35.93        | 35.89        | 35.90        | 35.78        |       |
| TN43                | N5       | Jan-95 | 1995.1 | a      |             |             |             |             |             |             | 0.00        |             | 1.97        | 0.71        |              |              |              |              |              |              | 36.05        | 36.06        | 35.88        | 35.78        |       |
| SK99                | 10       | Feb-95 | 1995.2 | a      |             |             |             |             |             |             |             |             |             |             | 19.08        | 17.57        | 15.84        |              |              | 35.96        | 36.06        | 36.14        |              |              |       |
| SK99 means          | DRIFT11  | Feb-95 | 1995.2 | a      |             |             |             |             |             | 0.61        | 0.44        | 0.11        | 0.02        | 0.01        |              |              |              |              |              | 35.89        | 36.07        | 36.15        |              |              |       |
| TN45                | N5       | Mar-95 | 1995.2 | a      |             |             |             |             |             |             | 0.19        | 2.08        | 0.38        | 0.02        |              | 18.28        | 16.04        | 14.29        | 13.03        |              | 35.89        | 36.10        | 35.97        | 35.81        |       |
| TN54                | N5       | Dec-95 | 1995.9 | a      |             |             |             |             |             |             | 4.25        | 2.18        | 1.80        | 0.69        |              | 17.03        | 14.89        | 13.53        | 12.60        |              | 35.93        | 36.00        | 35.84        | 35.75        |       |
| SK121 means         | DRIFT8   | Feb-97 | 1997.2 | a      | 0.25        | 0.04        | 0.06        | 0.05        | 0.06        | 0.03        | 0.57        | 0.38        | 0.85        | 0.34        | 20.23        | 18.08        | 15.78        | 14.05        | 13.06        | 35.93        | 35.89        | 36.03        | 35.85        | 35.76        |       |
| GV118               | 2697     | Apr-83 | 1983.3 | b      |             |             |             |             |             | 0.04        | 0.00        | 0.04        | 0.00        | 1.26        |              |              |              |              |              |              |              |              |              |              |       |
| GV118               | 2699     | Apr-83 | 1983.3 | b      |             |             |             |             |             | 0.00        | 2.53        | 0.07        | 2.22        | 0.00        |              |              |              |              |              |              |              |              |              |              |       |
| PV30                | 4448     | Apr-90 | 1990.3 | b      | 0.65        | 0.31        | 0.32        | 0.19        |             | 0.02        | 0.05        | 0.02        | 0.06        |             | 20.35        | 17.92        | 16.52        | 14.15        | 13.07        | 36.24        | 35.95        | 36.33        | 36.01        | 35.86        |       |
| PV30                | 4452     | Apr-90 | 1990.3 | b      |             | 0.26        | 0.15        | 0.22        |             | 0.06        | 0.11        | 0.03        | 0.04        |             | 21.15        | 18.84        | 15.75        | 14.49        | 13.11        | 36.23        | 35.99        | 36.01        | 36.09        | 35.88        |       |
| PV30                | 4465     | Apr-90 | 1990.3 | b      | 0.50        | 0.27        | 0.15        |             |             | 0.02        | 0.02        | 0.02        | 1.09        |             | 20.92        | 19.13        | 16.73        | 14.40        | 13.03        | 36.25        | 36.12        | 36.33        | 36.06        | 35.84        |       |
| SK91                | HY23     | Apr-94 | 1994.3 | b      |             |             | 0.09        |             |             |             | 1.18        | 0.01        |             |             | 20.00        | 18.89        | 15.68        | 13.38        | 12.67        | 35.18        | 36.31        | 36.08        | 35.80        | 35.79        |       |
| ME32/3              | 237      | May-95 | 1995.4 | b      |             |             |             |             |             | 0.07        | 0.88        | 0.98        | 0.02        |             | 20.49        | 18.05        | 16.13        | 14.67        | 13.00        | 36.07        | 35.97        | 36.15        | 36.05        | 35.81        |       |
| AAS42               | 19       | Feb-02 | 2002.2 | b      | 0.15        | 0.07        | 0.15        | 0.13        | 0.10        |             |             |             |             |             | 19.70        | 17.80        | 16.10        | 14.11        | 12.93        | 35.91        | 35.99        | 36.21        | 35.96        | 35.79        |       |
| ML19                | 1510     | Jun-66 | 1966.5 | c      |             | 0.21        |             | 0.18        |             | 0.00        | 0.00        | 1.01        | 0.00        | 0.76        | 21.30        | 18.38        | 15.49        | 13.78        | 12.56        | 36.15        | 35.86        | 36.00        | 35.86        | 35.75        |       |
| SC                  |          | Jun-72 | 1972.5 | c      |             |             |             |             |             |             | 0.15        |             |             |             |              |              |              |              |              |              |              |              |              |              |       |
| SK34                | M13      | Jul-87 | 1987.5 | c      |             | 0.19        |             | 0.06        |             |             |             | 3.55        | 2.44        | 0.81        |              | 18.16        | 15.57        | 14.35        | 12.81        |              | 36.16        | 36.06        | 35.97        | 35.79        |       |
| SK34                | M14      | Jul-87 | 1987.5 | c      |             | 0.03        |             |             | 0.02        | 0.00        | 2.98        |             |             | 0.10        | 21.33        | 17.80        |              |              | 12.80        | 36.24        | 35.71        |              |              | 35.79        |       |
| TN49                | N5       | Jul-95 | 1995.5 | c      |             |             |             |             |             | 0.62        |             | 1.31        | 1.20        | 0.00        | 19.35        |              | 15.50        | 13.75        | 12.60        | 35.96        |              | 36.10        | 35.99        | 35.76        |       |
| TN50                | N5       | Aug-95 | 1995.6 | c      |             |             |             |             |             |             | 3.10        | 2.34        | 0.92        | 0.64        |              | 17.64        | 15.45        | 13.60        | 12.50        |              | 35.90        | 36.05        | 35.86        | 35.72        |       |
| WOCE I07N           | 819      | Aug-95 | 1995.6 | c      |             |             |             |             |             |             |             | 1.10        |             | 0.82        |              |              |              |              |              |              |              |              |              |              |       |
| SK115               | 8        | Aug-96 | 1996.6 | c      | 0.45        | 0.07        | 0.05        | 0.02        |             |             |             |             |             |             |              |              |              |              |              |              |              |              |              |              |       |
| SK115               | 9        | Aug-96 | 1996.6 | c      |             |             |             |             |             | 0.00        | 0.00        | 0.00        | 0.00        |             |              | 17.75        | 16.33        | 13.80        | 12.87        | 36.08        | 35.99        | 36.29        | 35.88        | 35.77        |       |
| SONNE 119           |          | May-97 | 1997.4 | c      |             |             |             |             |             |             |             |             |             |             | 19.23        | 17.57        |              |              |              | 35.85        | 36.10        |              |              |              |       |
| VI                  | 4855     | Nov-60 | 1960.8 | d      | 0.19        |             |             |             |             | 0.02        | 1.60        | 2.28        | 1.78        | 1.58        | 20.01        | 17.64        | 14.94        | 13.74        | 12.70        | 35.97        | 35.89        | 35.95        | 35.79        | 35.77        |       |
| AB                  | 185      | Oct-63 | 1963.8 | d      | 0.28        | 0.23        |             |             |             | 0.03        | 0.02        |             | 1.37        |             | 18.77        | 17.73        |              | 13.56        |              | 35.82        | 36.03        |              |              | 35.87        |       |
| AB                  | 186      | Oct-63 | 1963.8 | d      | 0.53        |             |             | 0.28        |             | 0.06        | 0.01        |             | 0.08        |             | 18.91        | 17.30        |              | 13.63        |              | 35.91        | 35.89        |              |              | 35.89        |       |
| SK47                | M14      | Nov-88 | 1988.8 | d      | 0.42        |             |             |             | 0.11        | 0.00        | 1.32        |             | 0.45        | 0.09        | 20.42        | 17.86        |              | 13.52        | 12.50        | 36.16        |              |              |              | 35.85        | 35.70 |
| SK47                | M13      | Nov-88 | 1988.8 | d      | 0.13        | 0.12        |             |             |             | 0.00        | 0.00        | 1.61        | 0.64        | 0.00        | 19.37        | 17.95        | 15.92        | 14.02        |              | 35.93        | 36.05        | 36.12        | 35.93        |              |       |
| TN39                | 21       | Oct-94 | 1994.8 | d      |             |             |             |             |             | 0.09        | 0.12        | 1.00        | 0.09        | 0.46        |              |              |              |              |              |              |              |              |              |              |       |
| TN39                | 20       | Oct-94 | 1994.8 | d      |             |             |             |             |             | 1.19        | 1.73        | 0.75        | 1.20        | 1.01        | 18.57        | 17.05        | 15.44        | 13.50        | 12.45        | 35.98        | 36.04        | 36.12        | 35.85        | 35.73        |       |
| <b>Medians</b>      | <b>n</b> |        |        |        | <b>0.30</b> | <b>0.13</b> | <b>0.15</b> | <b>0.15</b> | <b>0.08</b> | <b>0.03</b> | <b>0.23</b> | <b>0.53</b> | <b>0.75</b> | <b>0.54</b> | <b>19.38</b> | <b>17.73</b> | <b>15.57</b> | <b>13.80</b> | <b>12.81</b> | <b>35.96</b> | <b>35.98</b> | <b>36.09</b> | <b>35.89</b> | <b>35.78</b> |       |
|                     |          |        |        |        | <b>19</b>   | <b>15</b>   | <b>12</b>   | <b>12</b>   | <b>6</b>    | <b>30</b>   | <b>34</b>   | <b>31</b>   | <b>32</b>   | <b>28</b>   | <b>33</b>    | <b>39</b>    | <b>32</b>    | <b>32</b>    | <b>32</b>    | <b>35</b>    | <b>38</b>    | <b>34</b>    | <b>32</b>    | <b>33</b>    |       |
| <b>Box G2, 21°N</b> |          |        |        |        |             |             |             |             |             |             |             |             |             |             |              |              |              |              |              |              |              |              |              |              |       |
| RQ865               | AS52     | Mar-61 | 1961.2 | a      |             |             |             |             |             |             |             |             |             |             | 19.97        | 17.64        | 15.20        | 13.52        |              | 35.73        | 35.71        | 35.98        | 35.82        |              |       |
| RQ865               | AS51     | Mar-61 | 1961.2 | a      |             |             |             |             |             |             |             |             |             |             | 19.73        | 17.93        | 15.33        | 13.41        | 12.36        | 35.82        | 35.88        | 36.02        | 35.83        | 35.73        |       |
| ME                  | 225      | Mar-65 | 1965.2 | a      | 1.12        | 0.04        | 0.04        | 0.04        | 0.04        | 0.07        | 0.06        | 2.08        | 1.14        | 1.52        | 20.60        | 17.84        | 16.03        | 13.92        | 12.70        | 36.00        | 35.68        | 36.07        | 35.89        | 35.75        |       |
| ME                  | 226      | Mar-65 | 1965.2 | a      | 0.68        | 0.06        | 0.06        | 0.04        | 0.08        | 0.01        |             |             |             |             | 19.11        | 17.33        | 15.00        | 13.64        | 12.93        | 35.92        | 35.89        | 35.95        | 35.86        | 35.78        |       |
| AT                  | 2354     | Jan-77 | 1977.1 | a      | 0.37        | 0.20        |             |             |             |             | 2.21        |             |             |             | 21.99        | 18.99        | 15.28        |              |              | 35.63        | 35.94        | 36.02        |              |              |       |
| AT                  | 2342     | Jan-77 | 1977.1 | a      |             | 0.19        |             |             |             |             |             | 3.32        | 2.01        | 0.77        |              | 18.61        | 15.82        | 14.04        | 12.67        |              | 35.60        | 35.93        | 35.90        | 35.75        |       |
| AT                  | 2353     | Jan-77 | 1977.1 | a      | 0.33        | 0.08        |             |             |             |             | 0.09        | 3.35        | 2.38        | 0.90        | 20.29        | 17.45        | 15.31        | 14.12        | 12.78        | 35.55        | 35.56        | 35.81        | 35.87        | 35.75        |       |
| SK13                | 2        | Feb-85 | 1985.2 | a      |             |             |             |             |             | 0.00        | 0.50        | 2.80        | 2.20        |             | 20.04        | 17.83        | 15.28        |              |              | 35.92        | 35.91        | 35.95        |              |              |       |
| SK13                | 3        | Feb-85 | 1985.2 | a      |             |             |             |             |             |             |             |             |             |             |              |              |              |              |              |              | 35.85        |              |              |              |       |
| SK38                | M12      | Jan-88 | 1988.1 | a      |             |             |             |             |             |             |             |             |             |             | 19.99        | 17.75        | 15.23        | 13.56        | 12.74        | 36.09        | 35.96        | 35.98        | 35.82        | 35.77        |       |
| SK38                | M11      | Jan-88 | 1988.1 | a      |             |             |             |             |             |             |             |             |             |             | 20.18        | 17.18        | 15.03        | 13.29        | 12.27        | 36.04        | 35.96        | 36.02        | 35.82        | 35.75        |       |
| SK38                | M10      | Jan-88 | 1988.1 | a      |             |             |             |             |             |             |             |             |             |             | 20.55        | 18.57        |              |              |              | 35.94        | 35.96        |              |              |              |       |
| SK38                | M9       | Jan-88 | 1988.1 | a      |             |             |             |             |             |             |             |             |             |             | 22.20        | 19.04        |              | 14.27        | 13.24        | 36.34        | 35.81        |              | 35.89        | 35.78        |       |
| SS98                | 2500     | Jan-92 | 1992.1 | a      | 0.43        |             |             |             |             | 0.00        | 1.00        | 3.00        | 2.00        | 2.00        | 20.45        | 17.82        | 15.47        | 14.03        | 12.83        | 36.06        | 35.96        | 36.03        | 35.91        | 35.78        |       |
| SK99                | 7        | Feb-95 | 1995.2 | a      |             |             |             |             |             | 0.20        | 3.09        | 2.87        |             |             | 20.05        | 17.05        | 15.20        |              |              | 35.85        | 35.81        | 35.85        |              |              |       |
| SK99                | 8        | Feb-95 | 1995.2 | a      |             |             |             |             |             | 0.06        | 0.42        | 0.61        |             |             |              | 17.72        |              |              |              | 35.82        | 36.02        |              |              |              |       |
| GV118               | 2701     | Apr-83 | 1983.3 | b      |             |             |             |             |             | 0.00        | 0.31        | 2.50        | 1.42        | 1.36        |              |              |              |              |              |              |              |              |              |              |       |
| ML19                | 1509     | Jun-66 | 1966.5 | c      | 0.44        |             |             |             |             | 0.00        | 0.24        | 0.71        | 1.36        | 1.43        | 20.04        | 17.75        | 15.23        | 13.64        | 12.46        | 36.02        | 35.97        | 35.97        | 35.90        | 35.73        |       |
| SK34                | M9       | Jul-87 | 1987.5 | c      |             | 0.27        |             | 0.10        |             | 0.06        | 0.05        |             | 2.08        | 1.16        | 20.43        | 17.65        |              |              | 12.67        | 36.18        | 35.89        |              |              | 35.78        |       |
| SK34                | M12      | Jul-87 | 1987.5 | c      |             |             |             |             |             |             | 1.40        | 4.00        | 1.96        | 1.26        | 20.23        |              |              | 13.32        |              | 36.17        |              |              | 35.84        |              |       |
| SK34                | M11      | Jul-87 | 1987.5 | c      |             | 0.15        |             | 0.02        | 0.02        |             |             |             | 1.93        | 0.88        |              |              |              | 13.10        | 12.48        |              |              |              | 35.81        | 35.74        |       |
| SK34                | M10      | Jul-87 | 1987.5 | c      | 0.31        |             |             |             |             |             |             |             | 1.38        | 0.79        | 20.84        | 17.73        |              |              | 12.39        | 36.32        | 36.16        |              |              | 35.69        |       |
| SK87                | 13       | Sep-93 | 1993.7 | c      |             |             |             |             |             | 0.01        | 0.56        | 3.17        | 0.74        | 1.05        | 18.86        | 17.02        | 13.83        | 13.47        | 12.25        | 36.20        | 36.25        | 36.13        | 36.00        | 35.82        |       |
| SK148               | 61       | Sep-99 | 1999.7 | c      | 0.04        | 0.04        | 0.04        | 0.05        | 0.05        | 0.15        | 2.67        | 2.53        | 2.06        | 1.32        | 18.09        | 16.48        | 14.39        | 13.31        | 12.35        | 35.91        | 35.94        | 35.86        | 35.80        | 35.71        |       |

**Table S.1.c.** Sample statistics for the 200- to 500-m horizons in the OMZ (boxes D1 through G2).

| Depth        | Oxygen (mL L <sup>-1</sup> ) |      |      |      | Nitrite (μM) |      |      |      |
|--------------|------------------------------|------|------|------|--------------|------|------|------|
|              | 200m                         | 300m | 400m | 500m | 200m         | 300m | 400m | 500m |
| values       | 103                          | 80   | 93   | 95   | 210          | 195  | 189  | 175  |
| minimum      | 0.00                         | 0.00 | 0.00 | 0.01 | 0.00         | 0.00 | 0.00 | 0.00 |
| maximum      | 0.33                         | 0.37 | 0.60 | 0.33 | 10.22        | 4.14 | 4.72 | 2.66 |
| median       | 0.09                         | 0.09 | 0.09 | 0.11 | 1.40         | 1.67 | 0.30 | 0.04 |
| 75%ile       | 0.16                         | 0.15 | 0.15 | 0.16 | 3.16         | 2.80 | 1.50 | 0.62 |
| 25%ile       | 0.06                         | 0.05 | 0.06 | 0.08 | 0.05         | 0.22 | 0.02 | 0.00 |
| Total values | 371                          |      |      |      | 769          |      |      |      |

| Depth        | Temperature (°C) |       |       |       | Salinity |       |       |       |
|--------------|------------------|-------|-------|-------|----------|-------|-------|-------|
|              | 200m             | 300m  | 400m  | 500m  | 200m     | 300m  | 400m  | 500m  |
| values       | 227              | 214   | 201   | 197   | 232      | 217   | 201   | 201   |
| minimum      | 14.04            | 12.61 | 11.89 | 11.04 | 35.32    | 35.36 | 35.37 | 35.20 |
| maximum      | 19.33            | 16.94 | 14.86 | 13.69 | 36.31    | 36.33 | 36.10 | 35.90 |
| median       | 17.29            | 14.81 | 13.35 | 12.39 | 35.83    | 35.85 | 35.76 | 35.69 |
| 75%ile       | 17.78            | 15.41 | 13.79 | 12.70 | 35.96    | 36.02 | 35.87 | 35.75 |
| 25%ile       | 16.65            | 14.02 | 12.74 | 11.94 | 35.71    | 35.69 | 35.69 | 35.61 |
| Total values | 839              |       |       |       | 851      |       |       |       |

Table S.2. Median temperatures (°C) for all boxes near the indicated depths (number of values in parentheses; data in Table S.1.b).

| Box   | 150m       | 200m       | 300m       | 400m       | 500m       |
|-------|------------|------------|------------|------------|------------|
| A1+A2 | 17.84 (15) | 15.02 (15) | 12.28 (16) | 11.27 (11) | 10.72 (13) |
| B1    | 19.19 (17) | 15.62 (23) | 12.80 (22) | 11.69 (20) | 11.11 (18) |
| C1    | 20.12 (14) | 15.98 (23) | 13.26 (18) | 11.96 (15) | 11.45 (16) |
| D1    | 18.92 (28) | 16.80 (34) | 14.24 (36) | 12.81 (32) | 11.94 (31) |
| E1    | 19.73 (20) | 17.26 (23) | 14.80 (21) | 13.26 (20) | 12.16 (13) |
| F1    | 19.67 (38) | 17.60 (43) | 15.36 (44) | 13.76 (41) | 12.63 (43) |
| G1    | 19.38 (33) | 17.73 (39) | 15.57 (32) | 13.80 (32) | 12.81 (32) |
| B2    | 18.90 (14) | 15.53 (13) | 12.79 (13) | 11.60 (12) | 11.05 (12) |
| C2    | 17.99 ( 4) | 15.65 ( 5) | 12.93 ( 4) | 12.09 ( 4) | 11.37 ( 3) |
| D2    | 18.85 (34) | 16.20 (39) | 13.71 (37) | 12.43 (34) | 11.79 (35) |
| E2    | 18.88 (12) | 16.77 (16) | 14.25 (16) | 13.02 (15) | 12.22 (15) |
| F2    | 19.63 (11) | 17.43 (11) | 14.92 (11) | 13.51 (11) | 12.60 (12) |
| G2    | 20.23 (21) | 17.75 (22) | 15.23 (17) | 13.60 (16) | 12.67 (16) |

Table S.2.1. Field comparison between two methods of endpoint detection in the Winkler procedure (n, number of observations; p, significance level of difference by one-tailed rank test; *sign*, the *p* values could not be looked up, but since the VED and AED data do not overlap, the difference is clearly significant; *ns*, not significant).

| Date, Box                            | 200 m     |   | 300 m       |   | 400 m       |   | 500 m       |   |
|--------------------------------------|-----------|---|-------------|---|-------------|---|-------------|---|
|                                      | values    | n | values      | n | values      | n | values      | n |
| October–March, 1994-1995             |           |   |             |   |             |   |             |   |
| Box D1 (centered at 15°N, 65°E)      |           |   |             |   |             |   |             |   |
| VED                                  | —         |   | —           |   | 0.08        | 2 | 0.11        | 2 |
| AED                                  | —         |   | —           |   | 0.025       | 3 | 0.06        | 3 |
| p                                    |           |   |             |   | <i>0.10</i> |   | <i>0.10</i> |   |
| Box D2 (centered at 15°N, 67°E)      |           |   |             |   |             |   |             |   |
| VED                                  | 0.06      | 2 | 0.055       | 3 | 0.08        | 2 | 0.12        | 2 |
| AED                                  | 0.05      | 2 | 0.025       | 2 | 0.025       | 2 | 0.035       | 2 |
| p                                    | <i>ns</i> |   | <i>sign</i> |   | <i>sign</i> |   | <i>sign</i> |   |
| June–September, 1995                 |           |   |             |   |             |   |             |   |
| Boxes D1+F1 (centered at 20°N, 65°E) |           |   |             |   |             |   |             |   |
| VED                                  | 0.075     | 2 | 0.04        | 3 | 0.085       | 4 | 0.09        | 4 |
| AED                                  | 0.065     | 5 | 0.010       | 4 | 0.025       | 4 | 0.045       | 4 |
| p                                    | <i>ns</i> |   | <i>ns</i>   |   | <i>0.01</i> |   | <i>0.01</i> |   |
| Box D2 (centered at 15°N, 67°E)      |           |   |             |   |             |   |             |   |
| VED                                  | 0.03      | 4 | 0.04        | 3 | 0.05        | 4 | 0.10        | 4 |
| AED                                  | 0.02      | 4 | 0.02        | 3 | 0.020       | 3 | 0.04        | 3 |
| p                                    | <i>ns</i> |   | <i>ns</i>   |   | <i>ns</i>   |   | <i>ns</i>   |   |

Table S.3. Median salinities (psu) for all boxes near the indicated depths (number of values in parentheses; data in Table S.1.b).

| Box   | 150m       | 200m       | 300m       | 400m       | 500m       |
|-------|------------|------------|------------|------------|------------|
| A1+A2 | 35.38 (15) | 35.27 (15) | 35.22 (16) | 35.21 (11) | 35.24 (13) |
| B1    | 35.53 (16) | 35.35 (23) | 35.32 (21) | 35.33 (18) | 35.33 (17) |
| C1    | 35.72 (14) | 35.61 (21) | 35.48 (17) | 35.40 (14) | 35.41 (15) |
| D1    | 35.78 (28) | 35.71 (34) | 35.69 (36) | 35.61 (32) | 35.56 (32) |
| E1    | 35.94 (19) | 35.87 (22) | 35.83 (20) | 35.74 (20) | 35.63 (14) |
| F1    | 36.00 (38) | 35.95 (45) | 36.00 (44) | 35.87 (40) | 35.74 (43) |
| G1    | 35.96 (35) | 35.98 (38) | 36.09 (34) | 35.89 (32) | 35.78 (33) |
| B2    | 35.56 (14) | 35.32 (13) | 35.28 (13) | 35.28 (12) | 35.30 (12) |
| C2    | 35.53 ( 4) | 35.34 ( 5) | 35.35 ( 4) | 35.40 ( 3) | 35.38 ( 3) |
| D2    | 35.76 (34) | 35.64 (41) | 35.62 (39) | 35.54 (35) | 35.52 (36) |
| E2    | 35.76 (13) | 35.78 (17) | 35.71 (16) | 35.67 (15) | 35.66 (15) |
| F2    | 35.87 (11) | 35.82 (12) | 35.85 (11) | 35.76 (11) | 35.70 (12) |
| G2    | 36.01 (22) | 35.89 (23) | 35.97 (17) | 35.87 (16) | 35.75 (16) |

Table S.4. Slopes of regressions of salinity on year for mostly three to four decades (p of slope: \*,  $\leq 0.20$ ; \*\*,  $\leq 0.10$ ; \*\*\*,  $\leq 0.05$ ; n: number of values; S.E., Standard Error of regression).

| Box     | Depth (m) | Year (add 1900) | Slope ( $a^{-1}$ ) | p          | n  | S.E.  |
|---------|-----------|-----------------|--------------------|------------|----|-------|
| A1 + A2 | 150       | '64 - '95       | 0.00865            | 0.03***    | 15 | 0.151 |
|         | 200       | '64 - '95       | 0.00320            | 0.14*      | 15 | 0.081 |
|         | 300       | '64 - '95       | 0.00185            | 0.11*      | 16 | 0.046 |
|         | 400       | '64 - '95       | 0.00384            | 0.02***    | 11 | 0.052 |
|         | 500       | '70 - '95       | 0.00130            | 0.37       | 13 | 0.046 |
| B1      | 150       | '59 - '97       | 0.00258            | 0.19*      | 16 | 0.100 |
|         | 200       | '59 - '97       | -0.00088           | 0.52       | 23 | 0.086 |
|         | 300       | '59 - '97       | 0.00138            | 0.09**     | 21 | 0.049 |
|         | 400       | '59 - '97       | 0.00373            | < 0.001*** | 18 | 0.041 |
|         | 500       | '59 - '95       | 0.00220            | 0.01***    | 17 | 0.045 |
| C1      | 150       | '60 - '95       | 0.00610            | 0.004***   | 14 | 0.082 |
|         | 200       | '60 - '95       | 0.00400            | 0.07**     | 21 | 0.116 |
|         | 300       | '60 - '95       | 0.00464            | 0.06**     | 17 | 0.115 |
|         | 400       | '60 - '95       | 0.00126            | 0.07**     | 14 | 0.031 |
|         | 500       | '60 - '95       | 0.00180            | 0.04***    | 15 | 0.038 |
| D1      | 150       | '63 - '104      | -0.00115           | 0.55       | 28 | 0.107 |
|         | 200       | '63 - '104      | -0.00184           | 0.03***    | 34 | 0.110 |
|         | 300       | '63 - '104      | -0.00346           | 0.12*      | 36 | 0.132 |
|         | 400       | '63 - '104      | -0.00076           | 0.64       | 32 | 0.095 |
|         | 500       | '63 - '104      | 0.00037            | 0.76       | 32 | 0.070 |
| E1      | 150       | '60 - '96       | 0.00288            | 0.58       | 19 | 0.264 |
|         | 200       | '60 - '96       | 0.00191            | 0.47       | 22 | 0.141 |
|         | 300       | '60 - '96       | 0.00086            | 0.78       | 20 | 0.151 |
|         | 400       | '60 - '96       | 0.00221            | 0.29       | 20 | 0.111 |
|         | 500       | '60 - '96       | -0.00053           | 0.68       | 14 | 0.053 |
| F1      | 150       | '60 - '104      | -0.00033           | 0.89       | 38 | 0.136 |
|         | 200       | '60 - '104      | -0.00066           | 0.73       | 45 | 0.105 |
|         | 300       | '60 - '104      | 0.00184            | 0.34       | 44 | 0.121 |
|         | 400       | '60 - '104      | 0.00232            | 0.0**      | 40 | 0.071 |
|         | 500       | '60 - '104      | 0.00111            | 0.34       | 43 | 0.071 |
| G1      | 150       | '60 - '102      | 0.00084            | 0.76       | 35 | 0.193 |
|         | 200       | '60 - '102      | 0.00279            | 0.08**     | 38 | 0.113 |
|         | 300       | '60 - '102      | 0.00398            | 0.07**     | 34 | 0.108 |
|         | 400       | '60 - '102      | 0.00291            | 0.06**     | 32 | 0.090 |
|         | 500       | '60 - '102      | 0.00108            | 0.28       | 33 | 0.050 |
| B2      | 150       | '63 - '92       | -0.00111           | 0.77       | 14 | 0.146 |
|         | 200       | '63 - '92       | 0.00349            | 0.12*      | 13 | 0.080 |
|         | 300       | '63 - '92       | 0.00157            | 0.17*      | 13 | 0.041 |
|         | 400       | '63 - '92       | 0.00281            | 0.05***    | 12 | 0.048 |
|         | 500       | '63 - '92       | 0.00087            | 0.52       | 12 | 0.050 |



Table S.4 (continued)

|    |     |            |          |          |    |       |
|----|-----|------------|----------|----------|----|-------|
| D2 | 150 | '60 - '104 | -0.00273 | 0.23     | 34 | 0.140 |
|    | 200 | '60 - '104 | 0.00001  | 0.97     | 41 | 0.104 |
|    | 300 | '60 - '104 | -0.00373 | 0.004*** | 39 | 0.079 |
|    | 400 | '60 - '104 | -0.00126 | 0.27     | 35 | 0.065 |
|    | 500 | '60 - '104 | 0.00130  | 0.28     | 36 | 0.075 |
| E2 | 150 | '60 - '96  | 0.00092  | 0.80     | 13 | 0.168 |
|    | 200 | '60 - '96  | 0.00509  | 0.05***  | 17 | 0.122 |
|    | 300 | '60 - '96  | 0.00087  | 0.72     | 16 | 0.116 |
|    | 400 | '60 - '96  | -0.00091 | 0.61     | 15 | 0.085 |
|    | 500 | '60 - '96  | -0.00029 | 0.88     | 15 | 0.090 |
| F2 | 150 | '63 - '99  | 0.00685  | 0.05***  | 11 | 0.129 |
|    | 200 | '63 - '99  | 0.00582  | 0.14*    | 12 | 0.160 |
|    | 300 | '63 - '99  | -0.00015 | 0.93     | 11 | 0.069 |
|    | 400 | '63 - '99  | -0.00137 | 0.33     | 11 | 0.057 |
|    | 500 | '63 - '99  | 0.00144  | 0.88     | 12 | 0.040 |
| G2 | 150 | '65 - '99  | 0.00461  | 0.37     | 22 | 0.222 |
|    | 200 | '65 - '99  | 0.00581  | 0.04***  | 23 | 0.145 |
|    | 300 | '65 - '99  | -0.00022 | 0.94     | 17 | 0.121 |
|    | 400 | '65 - '99  | 0.00027  | 0.81     | 16 | 0.053 |
|    | 500 | '65 - '95  | 0.00094  | 0.82     | 16 | 0.164 |

Table S.5. Seasonal regressions of salinity on year in the OMZ with medians and slopes  $\geq 15$  years spanned by data and  $n \geq 5$  (p of slope: \*,  $\leq 0.20$ ; \*\*,  $\leq 0.10$ ; \*\*\*,  $\leq 0.05$ ; n: number of values; S.E., Standard Error of regression). See Fig. 3 for names of seasons and months.

| Box | Depth | Season | Year<br>(add 1900) | Median     | Slope<br>( $a^{-1}$ ) | p        | n    | S.E.  |
|-----|-------|--------|--------------------|------------|-----------------------|----------|------|-------|
| D1  | 150   | NEM    | '80 - '95          | 35.70      | -0.00409              | 0.45     | 10   | 0.099 |
|     | 200   | NEM    | '80 - '98          | 35.675     | -0.00674              | 0.25     | 14   | 0.137 |
|     | 300   | NEM    | '80 - '98          | 35.655     | -0.00546              | 0.41     | 14   | 0.159 |
|     | 400   | NEM    | '80 - '98          | 35.595     | -0.00123              | 0.78     | 14   | 0.108 |
|     | 500   | NEM    | '80 - '98          | 35.55      | 0.00137               | 0.64     | 14   | 0.072 |
|     | 200   | SI     | '64 - '97          | 35.80      | -0.00518              | 0.30     | 5    | 0.116 |
|     | 300   | SI     | '64 - '97          | 35.67      | -0.00523              | 0.06**   | 5    | 0.050 |
|     | 150   | SWM    | '63 - '104         | 35.805     | 0.000                 | 0.99     | 12   | 0.120 |
|     | 200   | SWM    | '63 - '104         | 35.71      | -0.00304              | 0.17*    | 13   | 0.096 |
|     | 300   | SWM    | '63 - '104         | 35.78      | -0.00271              | 0.27     | 16   | 0.112 |
|     | 400   | SWM    | '63 - '104         | 35.67      | -0.00084              | 0.71     | 13   | 0.100 |
|     | 500   | SWM    | '63 - '104         | 35.59      | -0.00121              | 0.50     | 13   | 0.072 |
|     | E1    | 150    | NEM                | '77 - '95  | 35.94                 | -0.00974 | 0.31 | 7     |
| 200 |       | NEM    | '77 - '98          | 35.87      | 0.00978               | 0.29     | 7    | 0.126 |
| 300 |       | NEM    | '77 - '98          | 35.83      | -0.00226              | 0.80     | 8    | 0.143 |
| 400 |       | NEM    | '77 - '98          | 35.71      | 0.00495               | 0.50     | 7    | 0.110 |
| 500 |       | NEM    | '77 - '98          | 35.62      | 0.00363               | 0.33     | 6    | 0.049 |
| 200 |       | SI     | '60 - '95          | 35.83      | 0.00079               | 0.85     | 6    | 0.139 |
| 400 |       | SI     | '60 - '95          | 35.76      | 0.00592               | 0.29     | 5    | 0.151 |
| 150 |       | SWM    | '70 - '96          | 35.86      | -0.00300              | 0.70     | 7    | 0.209 |
| 200 |       | SWM    | '70 - '96          | 35.89      | -0.00383              | 0.57     | 7    | 0.175 |
| 300 |       | SWM    | '70 - '96          | 35.87      | 0.00157               | 0.85     | 6    | 0.212 |
| 400 |       | SWM    | '70 - '96          | 35.71      | 0.00167               | 0.70     | 6    | 0.112 |
| 500 |       | SWM    | '70 - '96          | 35.62      | -0.00197              | 0.23     | 5    | 0.031 |
| F1  |       | 150    | NEM                | '77 - '102 | 36.00                 | -0.00620 | 0.30 | 17    |
|     | 200   | NEM    | '77 - '102         | 35.93      | 0.00228               | 0.55     | 21   | 0.094 |
|     | 300   | NEM    | '77 - '102         | 35.96      | 0.00450               | 0.25     | 21   | 0.096 |
|     | 400   | NEM    | '77 - '102         | 35.86      | 0.00326               | 0.17*    | 19   | 0.049 |
|     | 500   | NEM    | '77 - '102         | 35.735     | 0.00308               | 0.30     | 20   | 0.063 |
|     | 150   | SI     | '73 - '97          | 35.94      | -0.00860              | 0.39     | 9    | 0.190 |
|     | 200   | SI     | '73 - '97          | 35.945     | 0.00173               | 0.75     | 10   | 0.109 |
|     | 300   | SI     | '73 - '96          | 36.10      | 0.00806               | 0.08**   | 9    | 0.078 |
|     | 400   | SI     | '73 - '96          | 35.93      | 0.00351               | 0.22     | 9    | 0.051 |
|     | 500   | SI     | '73 - '96          | 35.82      | 0.00460               | 0.15*    | 9    | 0.055 |
|     | 150   | SWM    | '63 - '104         | 36.00      | 0.00131               | 0.71     | 9    | 0.134 |
|     | 200   | SWM    | '63 - '104         | 35.98      | -0.00212              | 0.57     | 11   | 0.118 |
|     | 300   | SWM    | '63 - '104         | 36.08      | -0.00060              | 0.86     | 11   | 0.146 |
|     | 400   | SWM    | '63 - '104         | 35.89      | 0.00062               | 0.83     | 9    | 0.090 |
|     | 500   | SWM    | '63 - '104         | 35.72      | -0.00060              | 0.74     | 11   | 0.080 |
| G1  | 150   | NEM    | '61 - '97          | 35.93      | 0.00257               | 0.26     | 18   | 0.100 |
|     | 200   | NEM    | '61 - '97          | 35.96      | 0.00197               | 0.29     | 21   | 0.096 |
|     | 300   | NEM    | '61 - '97          | 36.07      | -0.00058              | 0.77     | 20   | 0.057 |
|     | 400   | NEM    | '61 - '97          | 35.88      | 0.00337               | 0.08**   | 15   | 0.068 |
|     | 500   | NEM    | '61 - '97          | 35.78      | 0.00224               | 0.03***  | 18   | 0.036 |

Table S.5 (continued)

|    |     |     |            |        |          |         |    |       |
|----|-----|-----|------------|--------|----------|---------|----|-------|
|    | 150 | SWM | '66 - '97  | 36.08  | -0.00670 | 0.32    | 5  | 0.146 |
|    | 200 | SWM | '66 - '97  | 35.945 | 0.00485  | 0.51    | 6  | 0.173 |
|    | 300 | SWM | '66 - '96  | 36.06  | 0.00525  | 0.29    | 5  | 0.104 |
|    | 400 | SWM | '66 - '96  | 35.88  | 0.00155  | 0.61    | 5  | 0.069 |
|    | 500 | SWM | '66 - '96  | 35.765 | -0.00001 | 0.97    | 6  | 0.030 |
|    | 150 | FI  | '63 - '94  | 35.95  | 0.00391  | 0.27    | 6  | 0.106 |
|    | 200 | FI  | '60 - '94  | 36.03  | 0.00375  | 0.16*   | 5  | 0.065 |
|    | 400 | FI  | '60 - '94  | 35.86  | 0.00094  | 0.55    | 6  | 0.050 |
| D2 | 150 | NEM | '77 - '98  | 35.76  | -0.00870 | 0.09**  | 13 | 0.131 |
|    | 200 | NEM | '77 - '98  | 35.68  | -0.00672 | 0.11*   | 17 | 0.117 |
|    | 300 | NEM | '77 - '98  | 35.58  | -0.00555 | 0.03*** | 16 | 0.063 |
|    | 400 | NEM | '77 - '98  | 35.53  | -0.00347 | 0.09**  | 18 | 0.057 |
|    | 500 | NEM | '77 - '98  | 35.52  | -0.00351 | 0.02*** | 17 | 0.037 |
|    | 200 | SI  | '60 - '96  | 35.62  | 0.00835  | 0.03*** | 5  | 0.067 |
|    | 300 | SI  | '60 - '96  | 35.64  | 0.00400  | 0.01*** | 5  | 0.021 |
|    | 150 | SWM | '63 - '104 | 35.76  | -0.00312 | 0.30    | 13 | 0.135 |
|    | 200 | SWM | '63 - '104 | 35.63  | 0.00067  | 0.65    | 15 | 0.066 |
|    | 300 | SWM | '63 - '104 | 35.64  | -0.00572 | 0.01*** | 14 | 0.086 |
|    | 400 | SWM | '63 - '104 | 35.54  | -0.00280 | 0.15*   | 10 | 0.064 |
|    | 500 | SWM | '63 - '104 | 35.52  | 0.00217  | 0.39    | 13 | 0.108 |
| E2 | 150 | NEM | '63 - '95  | 35.76  | 0.00201  | 0.84    | 7  | 0.241 |
|    | 200 | NEM | '63 - '95  | 35.82  | 0.00509  | 0.11*   | 9  | 0.078 |
|    | 300 | NEM | '63 - '95  | 35.70  | 0.00755  | 0.05*** | 9  | 0.089 |
|    | 400 | NEM | '63 - '95  | 35.62  | 0.00073  | 0.63    | 9  | 0.040 |
|    | 500 | NEM | '63 - '95  | 35.61  | 0.00127  | 0.75    | 9  | 0.106 |
| F2 | 150 | NEM | '65 - '88  | 35.86  | 0.00710  | 0.18*   | 8  | 0.153 |
|    | 200 | NEM | '65 - '88  | 35.84  | 0.00176  | 0.62    | 9  | 0.118 |
|    | 300 | NEM | '65 - '88  | 35.85  | 0.00115  | 0.60    | 9  | 0.071 |
|    | 400 | NEM | '65 - '88  | 35.76  | -0.00159 | 0.42    | 9  | 0.064 |
|    | 500 | NEM | '65 - '88  | 35.73  | 0.00073  | 0.55    | 9  | 0.040 |
| G2 | 150 | NEM | '61 - '95  | 35.93  | 0.00600  | 0.23    | 14 | 0.197 |
|    | 200 | NEM | '61 - '95  | 35.89  | 0.00544  | 0.07**  | 16 | 0.128 |
|    | 300 | NEM | '61 - '95  | 35.97  | -0.00162 | 0.42    | 12 | 0.077 |
|    | 400 | NEM | '61 - '92  | 35.87  | 0.00071  | 0.50    | 10 | 0.037 |
|    | 500 | NEM | '61 - '92  | 35.75  | 0.00079  | 0.15*   | 9  | 0.016 |
|    | 150 | SWM | '66 - '99  | 36.175 | 0.00014  | 0.98    | 6  | 0.162 |
|    | 200 | SWM | '66 - '99  | 35.97  | 0.00248  | 0.75    | 5  | 0.175 |
|    | 400 | SWM | '66 - '99  | 35.84  | -0.00109 | 0.79    | 5  | 0.094 |
|    | 500 | SWM | '66 - '99  | 35.735 | 0.00056  | 0.80    | 6  | 0.053 |

Table S.6. Slopes of regressions of O<sub>2</sub> (mL L<sup>-1</sup>) on year for mostly three to four decades, with n ≥ 5 (p of slope: \*, ≤ 0.20; \*\*, ≤ 0.10; \*\*\*, ≤ 0.05; n: number of values; S.E., Standard Error of regression).

| Box | Depth (m) | Year (add 1900) | Slope (mL L <sup>-1</sup> a <sup>-1</sup> ) | p        | n  | S.E.  |
|-----|-----------|-----------------|---------------------------------------------|----------|----|-------|
| A1  | 200       | '64 - '86       | 0.00328                                     | 0.83     | 5  | 0.286 |
| B1  | 150       | '59 - '85       | 0.00157                                     | 0.89     | 8  | 0.298 |
|     | 200       | '59 - '85       | 0.00266                                     | 0.69     | 13 | 0.177 |
|     | 300       | '59 - '85       | -0.00061                                    | 0.97     | 7  | 0.364 |
|     | 400       | '59 - '85       | 0.00203                                     | 0.85     | 8  | 0.280 |
|     | 500       | '59 - '85       | 0.00266                                     | 0.58     | 9  | 0.124 |
| C1  | 200       | '60 - '96       | 0.00686                                     | 0.07**   | 6  | 0.080 |
|     | 500       | '60 - '96       | -0.00137                                    | 0.56     | 6  | 0.058 |
| D1  | 150       | '63 - '104      | 0.00044                                     | 0.89     | 9  | 0.131 |
|     | 200       | '63 - '104      | -0.00105                                    | 0.50     | 12 | 0.079 |
|     | 300       | '63 - '104      | -0.00300                                    | 0.15*    | 9  | 0.080 |
|     | 400       | '63 - '104      | -0.00045                                    | 0.85     | 11 | 0.081 |
|     | 500       | '63 - '104      | -0.00088                                    | 0.57     | 13 | 0.064 |
| E1  | 150       | '60 - '98       | -0.00373                                    | 0.67     | 10 | 0.318 |
|     | 200       | '60 - '98       | -0.00129                                    | 0.27     | 8  | 0.038 |
|     | 300       | '60 - '98       | -0.00104                                    | 0.12*    | 6  | 0.017 |
|     | 400       | '63 - '94       | 0.00080                                     | 0.66     | 7  | 0.051 |
|     | 500       | '60 - '98       | 0.00027                                     | 0.82     | 9  | 0.043 |
| F1  | 150       | '63 - '104      | -0.00259                                    | 0.79     | 25 | 0.367 |
|     | 200       | '60 - '104      | -0.00111                                    | 0.58     | 23 | 0.092 |
|     | 300       | '88 - '104      | -0.01027                                    | 0.01***  | 15 | 0.062 |
|     | 400       | '63 - '104      | -0.00266                                    | 0.20*    | 7  | 0.069 |
|     | 500       | '63 - '104      | -0.00129                                    | 0.18*    | 16 | 0.039 |
| G1  | 150       | '60 - '102      | 0.00236                                     | 0.52     | 19 | 0.187 |
|     | 200       | '63 - '102      | -0.00100                                    | 0.53     | 15 | 0.098 |
|     | 300       | '65 - '102      | 0.00170                                     | 0.65     | 12 | 0.107 |
|     | 400       | '63 - '102      | -0.00230                                    | 0.21     | 12 | 0.074 |
|     | 500       | '65 - '102      | 0.00236                                     | 0.23     | 6  | 0.048 |
| B2  | 150       | '63 - '92       | 0.01574                                     | 0.02***  | 10 | 0.196 |
|     | 200       | '59 - '92       | 0.01842                                     | 0.003*** | 13 | 0.201 |
|     | 300       | '59 - '92       | 0.00285                                     | 0.73     | 11 | 0.311 |
|     | 400       | '63 - '92       | -0.00674                                    | 0.50     | 9  | 0.322 |
|     | 500       | '63 - '92       | -0.00033                                    | 0.96     | 12 | 0.268 |
| C2  | 200       | '79 - '94       | 0.00383                                     | 0.80     | 5  | 0.176 |
| D2  | 150       | '60 - '104      | -0.00499                                    | 0.20*    | 18 | 0.189 |
|     | 200       | '60 - '104      | -0.00142                                    | 0.03***  | 22 | 0.034 |
|     | 300       | '60 - '104      | -0.00322                                    | 0.001*** | 22 | 0.044 |
|     | 400       | '60 - '104      | -0.00437                                    | 0.03***  | 28 | 0.107 |
|     | 500       | '60 - '104      | -0.00158                                    | 0.20*    | 29 | 0.073 |

Table S.6 (continued)

|    |     |            |          |         |    |       |
|----|-----|------------|----------|---------|----|-------|
| E2 | 150 | '60 - '96  | 0.00300  | 0.59    | 19 | 0.176 |
|    | 200 | '60 - '96  | -0.00266 | 0.23    | 5  | 0.049 |
|    | 400 | '60 - '96  | -0.00187 | 0.03*** | 5  | 0.016 |
|    | 500 | '63 - '96  | -0.00015 | 0.96    | 9  | 0.075 |
| F2 | 150 | '63 - '99  | -0.00065 | 0.88    | 10 | 0.182 |
|    | 200 | '63 - '88  | 0.00100  | 0.24    | 7  | 0.026 |
|    | 300 | '63 - '99  | -0.00007 | 0.96    | 8  | 0.054 |
|    | 400 | '63 - '99  | 0.00119  | 0.49    | 8  | 0.062 |
|    | 500 | '63 - '99  | 0.00073  | 0.62    | 11 | 0.061 |
|    | 500 | '65 - '102 | 0.00236  | 0.23    | 6  | 0.048 |
| G2 | 150 | '65 - '99  | -0.01290 | 0.20*   | 9  | 0.331 |
|    | 200 | '65 - '99  | 0.00111  | 0.69    | 9  | 0.087 |

Table S.7. Slopes of regressions of  $\text{NO}_2^-$  ( $\mu\text{M}$ ) on years in the OMZ for values  $\geq 0.5$  and  $\geq 1.5$   $\mu\text{M}$  with  $n \geq 5$  (p of slope: \*,  $\leq 0.20$ ; \*\*,  $\leq 0.10$ ; \*\*\*,  $\leq 0.05$ ; n: number of values; S.E.: Standard Error of regression).

| Box | Depth<br>(m)     | Year<br>(add 1900) | $\geq 0.5 \mu\text{M}$            |         |    |      | $\geq 1.5 \mu\text{M}$ |                                   |          |    |      |
|-----|------------------|--------------------|-----------------------------------|---------|----|------|------------------------|-----------------------------------|----------|----|------|
|     |                  |                    | Slope<br>( $\mu\text{M a}^{-1}$ ) | p       | n  | S.E. | Year<br>(add 1900)     | Slope<br>( $\mu\text{M a}^{-1}$ ) | p        | n  | S.E. |
| D1  | 150              | '64-'98            | 0.0580                            | 0.33    | 11 | 1.87 | '80-'98                | -0.0122                           | 0.88     | 8  | 1.20 |
|     | 200              | '64-'104           | 0.0498                            | 0.18 *  | 18 | 1.31 | '64-'104               | 0.0368                            | 0.22     | 16 | 1.02 |
|     | 300              | '64-'98            | 0.0202                            | 0.31    | 17 | 0.63 | '64-'98                | 0.0253                            | 0.12*    | 14 | 0.49 |
| E1  | 200 <sup>†</sup> | '64-'96            | -0.0319                           | 0.60 *  | 6  | 1.48 | '64-'96                | -0.0213                           | 0.63     | 5  | 1.05 |
|     | 300              | '63-'98            | 0.0018                            | 0.19    | 13 | 1.14 | '63-'98                | 0.0204                            | 0.27     | 11 | 0.65 |
|     | 400              | '60-'98            | -0.0074                           | 0.79    | 12 | 1.24 | '70-'98                | -0.1035                           | 0.01***  | 5  | 0.44 |
| F1  | 150              | '90-'102           | 0.0082                            | 0.96    | 6  | 1.34 | —                      |                                   |          |    |      |
|     | 200              | '77-'102           | 0.0059                            | 0.90    | 21 | 1.25 | '77-'102               | -0.0085                           | 0.84     | 19 | 1.16 |
|     | 300              | '60-'102           | 0.0184                            | 0.73    | 27 | 0.90 | '60-'98                | 0.0184                            | 0.35     | 20 | 0.74 |
|     | 400              | '60-'96            | -0.0003                           | 0.98    | 26 | 0.51 | '77-'98                | -0.0105                           | 0.53     | 17 | 0.34 |
|     | 500              | '73-'98            | 0.0042                            | 0.84    | 17 | 0.61 | '77-'96                | -0.0570                           | <0.01*** | 6  | 0.08 |
| G1  | 200              | '60-'97            | 0.0224                            | 0.48    | 15 | 1.25 | '60-'95                | 0.0466                            | 0.16*    | 10 | 0.92 |
|     | 300              | '60-'95            | -0.0079                           | 0.70    | 16 | 0.81 | '60-'95                | -0.0038                           | 0.87     | 7  | 0.66 |
|     | 400              | '60-'97            | -0.0069                           | 0.58    | 18 | 0.57 | '60-'95                | 0.0045                            | 0.61     | 7  | 0.25 |
|     | 500              | '60-'95            | -0.0168                           | 0.01*** | 16 | 0.25 | —                      |                                   |          |    |      |
| D2  | 150              | '77-'104           | 0.0466                            | 0.19 *  | 27 | 1.34 | '79-'104               | 0.0216                            | 0.61     | 21 | 1.19 |
|     | 200              | '77-'104           | 0.0147                            | 0.63    | 34 | 1.31 | '77-'104               | -0.0200                           | 0.44     | 30 | 1.04 |
|     | 300              | '63-'104           | 0.0016                            | 0.95    | 24 | 1.06 | '77-'104               | -0.0017                           | 0.94     | 15 | 0.67 |
| E2  | 150              | '63-'96            | 0.0560                            | 0.08 ** | 6  | 0.71 | '94-'96                | 0.8363                            | 0.05***  | 5  | 0.41 |
|     | 200              | '60-'96            | 0.0159                            | 0.55    | 16 | 1.12 | '60-'96                | 0.0121                            | 0.64     | 15 | 1.09 |
|     | 300              | '83-'96            | 0.0308                            | 0.41    | 14 | 0.55 | '83-'96                | 0.0308                            | 0.41     | 14 | 0.55 |
|     | 400              | '60-'95            | -0.0201                           | 0.31    | 12 | 0.59 | '60-'95                | -0.0057                           | 0.44     | 8  | 0.20 |
| F2  | 200              | '65-'88            | 0.0398                            | 0.52    | 6  | 1.19 | '83-'88                | -0.0404                           | 0.05***  | 5  | 0.61 |
|     | 300              | '65-'99            | 0.0307                            | 0.18    | 9  | 0.74 | '65-'99                | 0.0307                            | 0.18     | 9  | 0.74 |
|     | 400              | '65-'99            | 0.0340                            | 0.22    | 7  | 0.77 | —                      |                                   |          |    |      |
| G2  | 200              | '85-'99            | 0.1371                            | 0.10 ** | 7  | 0.81 | —                      |                                   |          |    |      |
|     | 300              | '65-'99            | 0.0188                            | 0.46    | 14 | 0.96 | '65-'99                | 0.0127                            | 0.49     | 12 | 0.58 |
|     | 400              | '65-'99            | 0.0110                            | 0.45    | 14 | 0.49 | '77-'99                | -0.0076                           | 0.35     | 9  | 0.15 |
|     | 500              | '65-'99            | -0.0058                           | 0.96    | 13 | 0.37 | —                      |                                   |          |    |      |

<sup>†</sup>without 1970 outlier of 10.72  $\mu\text{M}$

Table S.8. Seasonal regressions of  $\text{NO}_2^- \geq 0.5 \mu\text{M}$  on year in OMZ with medians and slopes with  $n \geq 5$  (p of slope: \*,  $\leq 0.20$ ; \*\*,  $\leq 0.10$ ; \*\*\*,  $\leq 0.05$ ; n: number of values; S.E.: Standard Error of regression). See Fig. 3 for names of seasons and months.

| Box | Depth | Season | Year<br>(add 1900) | Median<br>( $\mu\text{M}$ ) | Slope<br>( $\mu\text{M a}^{-1}$ ) | p       | n  | S.E. |
|-----|-------|--------|--------------------|-----------------------------|-----------------------------------|---------|----|------|
| D1  | 150   | NEM    | '80 - '98          | 3.96                        | -0.0363                           | 0.82    | 6  | 2.21 |
|     | 200   | NEM    | '82 - '98          | 3.36                        | 0.0496                            | 0.56    | 10 | 1.49 |
|     | 300   | NEM    | '82 - '98          | 2.23                        | 0.0427                            | 0.40    | 8  | 0.60 |
| E1  | 300   | NEM    | '77 - '98          | 3.33                        | -0.0882                           | 0.31    | 6  | 1.22 |
| F1  | 150   | NEM    | '90 - '102         | 2.00                        | 0.0168                            | 0.92    | 5  | 1.33 |
|     | 200   | NEM    | '77 - '102         | 2.46                        | -0.0003                           | 0.99    | 12 | 1.26 |
|     | 300   | NEM    | '77 - '102         | 2.25                        | 0.0160                            | 0.68    | 15 | 0.94 |
|     | 400   | NEM    | '77 - '98          | 1.75                        | -0.0346                           | 0.09**  | 14 | 0.34 |
|     | 500   | NEM    | '77 - '98          | 1.03                        | -0.0234                           | 0.45    | 12 | 0.67 |
|     | 300   | SWM    | '63 - '95          | 1.85                        | 0.0171                            | 0.63    | 8  | 1.00 |
|     | 400   | SWM    | '87 - '96          | 1.66                        | 0.0125                            | 0.90    | 6  | 0.74 |
| G1  | 200   | NEM    | '65 - '97          | 3.29                        | 0.0495                            | 0.45    | 7  | 1.56 |
|     | 300   | NEM    | '85 - '95          | 1.65                        | 0.1261                            | 0.11*   | 6  | 0.54 |
|     | 400   | NEM    | '65 - '97          | 1.43                        | 0.0070                            | 0.76    | 9  | 0.59 |
|     | 500   | NEM    | '65 - '97          | 0.64                        | -0.0195                           | 0.05*** | 9  | 0.37 |
|     | 300   | SWM    | '66 - '95          | 1.31                        | 0.0175                            | 0.74    | 5  | 1.22 |
| D2  | 150   | NEM    | '77 - '98          | 2.14                        | 0.0728                            | 0.03*** | 13 | 0.68 |
|     | 200   | NEM    | '77 - '98          | 2.90                        | -0.0284                           | 0.60    | 13 | 1.30 |
|     | 300   | NEM    | '77 - '98          | 2.61                        | -0.0552                           | 0.38    | 8  | 1.04 |
|     | 200   | SI     | '80 - '96          | 2.82                        | -0.0117                           | 0.93    | 5  | 1.61 |
|     | 150   | SWM    | '83 - '104         | 2.66                        | -0.0200                           | 0.81    | 9  | 1.38 |
|     | 200   | SWM    | '83 - '104         | 3.40                        | -0.0264                           | 0.71    | 11 | 1.47 |
|     | 300   | SWM    | '63 - '104         | 1.92                        | 0.0257                            | 0.41    | 10 | 1.06 |
| E2  | 200   | NEM    | '63 - '95          | 3.36                        | 0.0551                            | 0.07*** | 7  | 0.66 |
|     | 300   | NEM    | '88 - '95          | 2.72                        | 0.0798                            | 0.23    | 8  | 0.55 |
|     | 400   | NEM    | '88 - '95          | 1.79                        | -0.0250                           | 0.75    | 6  | 0.53 |
| F2  | 300   | NEM    | '65 - '88          | 2.59                        | 0.0178                            | 0.58    | 6  | 0.85 |
|     | 400   | NEM    | '65 - '88          | 1.18                        | 0.0143                            | 0.67    | 5  | 0.78 |
| G2  | 300   | NEM    | '65 - '95          | 2.83                        | -0.0174                           | 0.62    | 8  | 0.95 |
|     | 400   | NEM    | '65 - '92          | 2.01                        | 0.0306                            | 0.24    | 5  | 0.42 |
|     | 400   | SWM    | '66 - '99          | 1.93                        | 0.0088                            | 0.70    | 7  | 0.54 |
|     | 500   | SWM    | '66 - '99          | 1.16                        | -0.0071                           | 0.49    | 7  | 0.24 |

### Supplementary Material, Figure Legends

Figure S.3.1. Eleven days of a 13-day drift station of February 1987, station 8 of cruise 121 of R/V *Sagar Kanya* near 21°N, 64°E (see asterisk in Fig. 1 and Table 3). **a**, salinity (> 36.0, hatched) and **b**, nitrite (> 1  $\mu$ M hatched) to 500 m depth. The ship drifted over about 80 km but re-occupied the central station several times.

Figure S.5.1. Examples of regressions of salinity on years with data for the NEM (circles; bold line and text in upper or middle part of panels) and SWM (squares; dashed line and text in lower part of panels) for three depths each in Boxes D2 and F1, with medians, p for slopes, and number of observations.



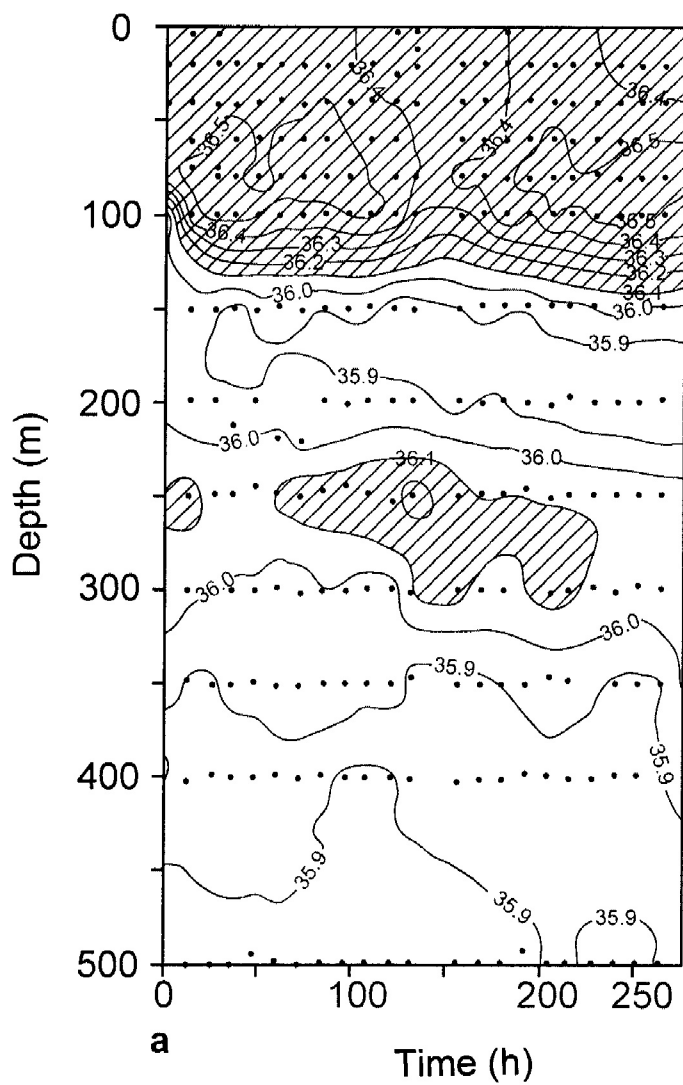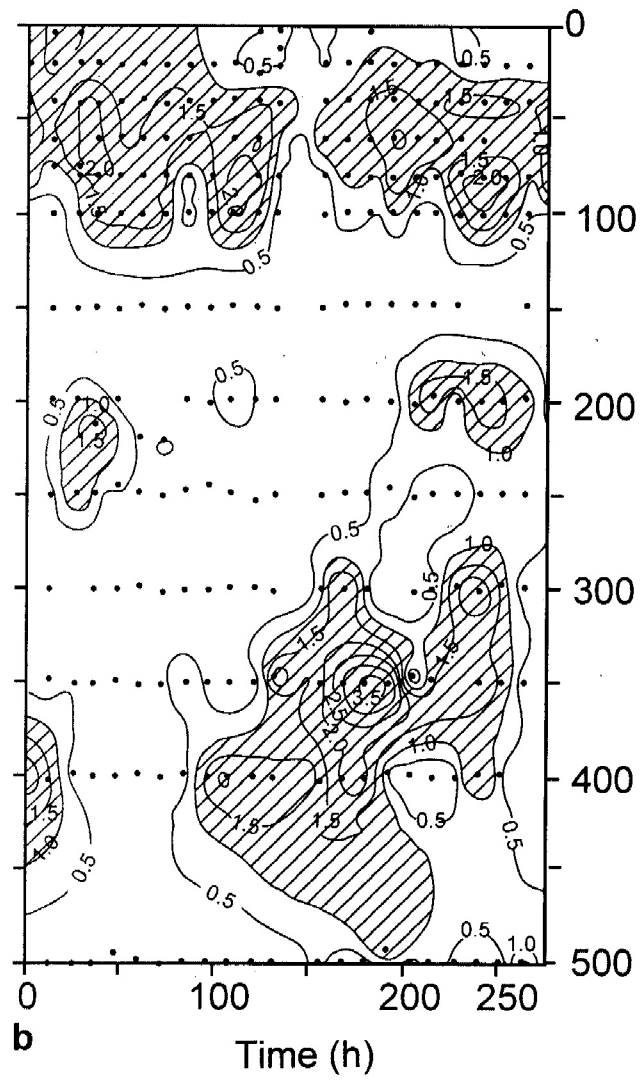

Scan Fig-3

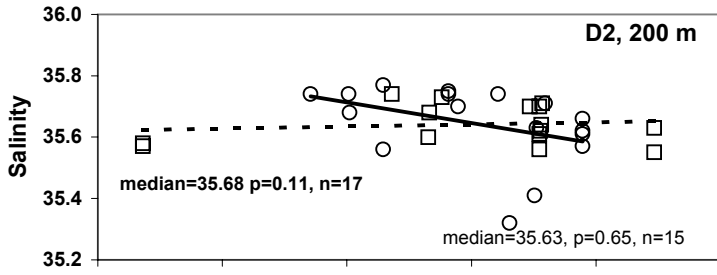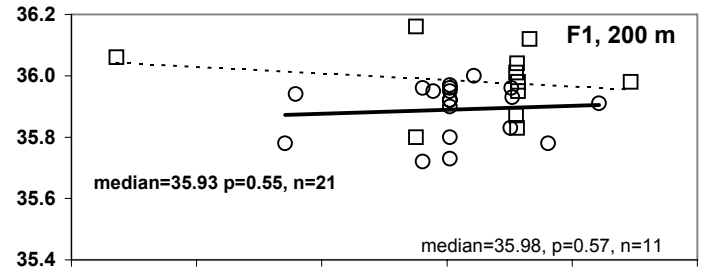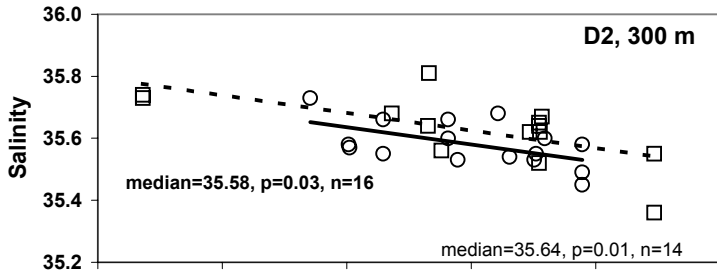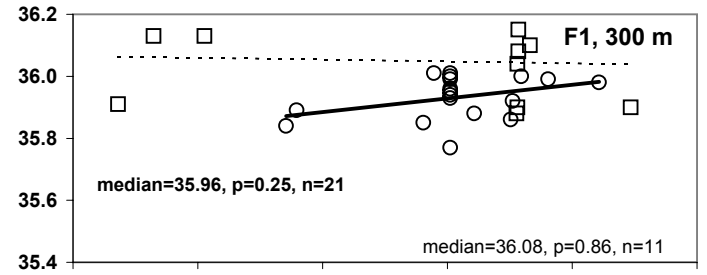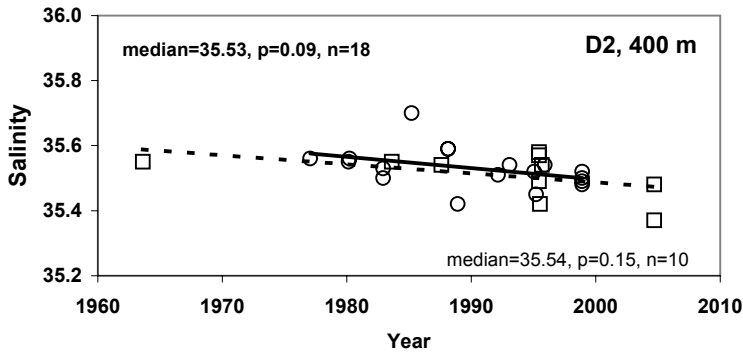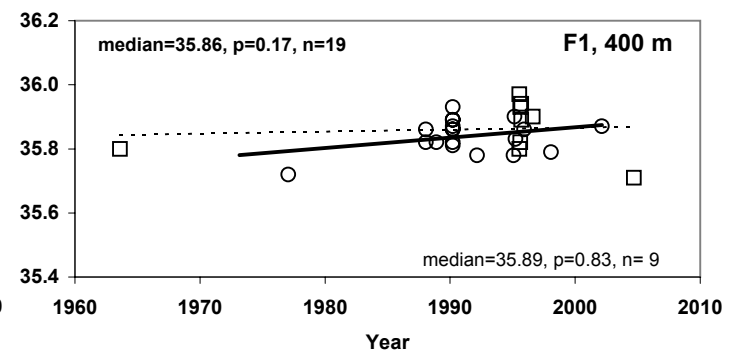

Supplement: Supplementary file 1 [file bg-11-2237-2014-supplement.pdf]
